# Supplementary material for: Genome-Wide Meta-Analysis of Cotinine Levels in Cigarette Smokers Identifies Locus at 4q13.2
Source: PubMed Central journal article supplement (PMC4735517; doi:10.1038/srep20092), 2016-02-01
Supplement: srep20092-s1.pdf [file srep20092-s1.pdf]

Genome-Wide Meta-Analysis of Cotinine Levels in Cigarette Smokers Identifies Locus at  
4q13.2

Jennifer J. Ware, Xiangning Chen, Jacqueline Vink, Anu Loukola, Camelia Minica, Rene Pool, Yuri Milaneschi, Massimo Mangino, Cristina Menni, Jingchun Chen, Roseann Peterson, Kirsi Auro, Leo-Pekka Lyytikäinen, Juho Wedenoja, Alex I. Stiby, Gibran Hemani, Gonneke Willemsen, Jouke Jan Hottenga, Tellervo Korhonen, Markku Heliövaara, Markus Perola, Richard Rose, Lavinia Paternoster, Nic Timpson, Catherine A. Wassenaar, Andy Z. X. Zhu, George Davey Smith, Olli Raitakari, Terho Lehtimäki, Mika Kähönen, Seppo Koskinen, Timothy Spector, Brenda W. J. H. Penninx, Veikko Salomaa, Dorret Boomsma, Rachel F. Tyndale, Jaakko Kaprio, Marcus R. Munafò

### **Supplementary Information**

Text S1: Cohort specific methods and acknowledgements

#### **ALSPAC**

*Study description:* The Avon Longitudinal Survey of Parents and Children (ALSPAC) is a prospective cohort study which recruited pregnant women residing in Avon, United Kingdom, with expected dates of delivery between 1 April 1991 and 31 December 1992. Full details of the study recruitment and methodology have been published previously<sup>1</sup>. A total of 14,541 pregnancies were included in the initial sample, resulting in 14,062 live births and 13,988 children who were alive at one year of age. Detailed information on mothers and their partners (during and after pregnancy) and the children (since birth) has been collected from self-report questionnaires and attendance at clinics. Our sample was limited to European offspring with available GWAS data and cotinine data (collected at age 17). Ethics approval

for the study was obtained from the ALSPAC Ethics and Law Committee and the Local Research Ethics Committee. Please note that the study website contains details of all the data that is available through a fully searchable data dictionary

(<http://www.bristol.ac.uk/alspac/researchers/data-access/data-dictionary/>).

*Cotinine assessment:* Cotinine was assayed from ethylenediaminetetraacetic acid serum plasma samples taken in a clinical assessment at 17 years. Plasma samples were stored at  $-80^{\circ}\text{C}$  and allowed to thaw at room temperature before use. Cotinine was measured using the Cozart Cotinine Enzyme Immunoassay (Concateno, [now Alere Toxicology] UK, Abingdon) serum kit (M155B1). All samples, calibrators, and controls were brought to room temperature before use and were run in duplicate. Where required, samples were diluted using cotinine-free serum (fetal calf serum). Absorbance was measured spectrophotometrically at a wavelength of 450nm. The lowest calibrator used was 0.5ng/ml serum, and values below this were treated as undetectable/null (0ng/ml serum).

*Acknowledgements:* We are extremely grateful to all the families who took part in this study, the midwives for their help in recruiting them, and the whole ALSPAC team, which includes interviewers, computer and laboratory technicians, clerical workers, research scientists, volunteers, managers, receptionists and nurses. The UK Medical Research Council and the Wellcome Trust (Grant ref: 092731) and the University of Bristol provide core support for ALSPAC. ALSPAC GWAS data were generated by Sample Logistics and Genotyping Facilities at the Wellcome Trust Sanger Institute and LabCorp (Laboratory Corporation of America) using support from 23andMe.

## **CARDIA**

*Study description:* CARDIA was designed to examine the development, determinants, and risk factors of clinical and subclinical cardiovascular disease. Participants were a part of The

National Heart, Lung, and Blood Institute's Coronary Artery Risk Development in Young Adults 'CARDIA' Study. A total of 5,115 young adult African and European American men and women completed the baseline examination in 1985–1986. The participants were selected so that there would be approximately the same number of people in subgroups of race, gender, education (high school or less and more than high school), and age (18–24 and 25–30) in each of four centers: Birmingham, AL; Chicago, IL; Minneapolis, MN; and Oakland, CA. Periodic follow-up examinations were held through 2006 with high participant retention (72–90%). Additional details can be found on the CARDIA website (<http://www.cardia.dopm.uab.edu/>). Some of the self-reported current smokers had base-line serum cotinine levels determined. Our study used the data from those subjects with cotinine assessment and of European ancestry.

*Cotinine assessment:* Blood for cotinine level analysis was collected under a standardized protocol. A 1ml aliquot of serum was frozen and shipped to the Clinical Biochemistry Laboratories at the American Health Foundation. Cotinine was determined by radioimmunoassay using the method of Haley et al.<sup>2</sup> after a modification of the method described by VanVunakis et al.<sup>3 4</sup>.

*Acknowledgements:* The Coronary Artery Risk Development in Young Adults Study (CARDIA) is conducted and supported by the National Heart, Lung, and Blood Institute (NHLBI) in collaboration with the University of Alabama at Birmingham (N01-HC95095 & N01-HC48047), University of Minnesota (N01-HC48048), Northwestern University (N01-HC48049), and Kaiser Foundation Research Institute (N01-HC48050). This manuscript was not approved by CARDIA. The opinions and conclusions contained in this publication are solely those of the authors, and are not endorsed by CARDIA or the NHLBI and should not be assumed to reflect the opinions or conclusions of either. Funding for CARE genotyping was provided by NHLBI Contract N01-HC-65226. Genotyping for the CARDIA GENEVA

cohort was supported by grant U01 HG004729 from the National Human Genome Research Institute.

### **FinnTwin12 and FinnTwin16**

*Study description:* Analyses were based on samples from unrelated individuals from the FinnTwin12 (FT12) and FinnTwin16 (FT16) cohort studies. FT12 is a population based-cohort longitudinal study of five consecutive birth cohorts of Finnish twins born between 1983 and 1987. All twins were initially contacted and invited to participate by mail in the autumn of the year in which their birth cohort reached 11 years of age, with follow-ups when the twins were aged 14, 17 and approximately 22 years. The FT16 is a population-based longitudinal study of five consecutive birth cohorts of Finnish twins born between 1975 and 1979. Each pair was initially approached immediately after the twins' 16th birthday. The baseline data collection started in 1991 and was completed in 1996. Waves 2-5 were made when the twins were 17, 18.5, approximately 25 years, and most recently at an average age of 34 years. For both the FT12 and FT16, the baseline and follow-up assessments included surveys of smoking habits and other health-related variables. In addition, in wave 4 blood samples for DNA extraction and biochemistry analyses were taken from all twins during a visit to the twin research clinic in Helsinki (Finland). Altogether 145 subjects were included in the GWAS discovery phase, with genome-wide genotype data generated with the Illumina Human670-QuadCustom BeadChip (Illumina, Inc., San Diego, CA, USA). In the replication phase 135 additional subjects were included, with genotype data for the top loci extracted from genome-wide genotype data generated with the Illumina HumanCoreExome-12v1-0 BeadChip and imputed according to the same protocol as for the discovery sample. Data collection and analysis were approved by the ethics committees of the Department of Public Health of the University of Helsinki, the Helsinki and Uusimaa Hospital District and

the IRB of Indiana University. Written informed consent was obtained from all participating twins.

*Cotinine assessment:* All biological samples were stored at -80°C at the National Institute for Health and Welfare. Serum samples were sent for cotinine measurement to University of Toronto (Dr. Rachel Tyndale). Samples were assessed by LCMS as previously described <sup>5</sup>.

*Acknowledgements:* The study has been supported by ENGAGE – European Network for Genetic and Genomic Epidemiology, FP7-HEALTH-F4-2007, grant agreement number 201413, Academy of Finland (grant numbers 265240 and 263278), and the Sigrid Juselius Foundation (to JK). Genome-wide genotyping was funded by Global Research Award for Nicotine Dependence/Pfizer Inc. (to JK), NIH (AA15416 to DM Dick), and Wellcome Trust Sanger Institute, UK. Phenotype collection has been supported by NIAAA (AA-12502, AA-00145, and AA-09203) and the Academy of Finland (141054 and 264146 to JK). Antti-Pekka Sarin and Samuli Ripatti are acknowledged for genotype imputation and post-imputation quality controls. Cotinine assessment was supported by the Canadian Institutes of Health Research (TMH109787) and NIH (PGRN DA020830) to Rachel Tyndale.

### **FINRISK 1992 and FINRISK2007**

*Study description:* The National FINRISK Study monitors risk factor level trends every five years since 1972. In 1992, the FINRISK survey was carried out to assess cardiovascular risk factor levels in Finland. The survey was conducted in four areas of Finland: (1) North Karelia province, (2) Kuopio, (3) Turku and Loimaa (representing South western Finland), and (4) Helsinki and Vantaa. A random sample of approximately 2,000 individuals aged 25-64 from each of the survey areas was drawn from the National Population Register. Altogether 7,927 individuals were enrolled, and 6,051 participated (76.3% participation rate). The survey

included a self-administered questionnaire (mainly covering questions on socioeconomic factors, medical history, health behavior, and psychological factors) and a cardiovascular risk factor examination. A detailed smoking history as described by Vartiainen and colleagues<sup>6</sup> was obtained. Blood samples for DNA extraction and biochemistry analyses were taken as part of the risk factor examination.

In 2007, the FINRISK survey was carried out in six regions of Finland: 1) Helsinki and Vantaa, 2) Turku and Loimaa, 3) North Savo, 4) North Karelia, 5) the Oulu region, and 6) Lapland. A two stage process was used. Participants (n = 11,953) from all regions were invited to fill in an extensive baseline questionnaire (n = 7,993, 67% response rate) and to attend a locally organized health examination in which blood samples were taken (all regions but Lapland). After the baseline study, a self-administered questionnaire with detailed smoking history was given to individuals who had stated during the first part of the study that they had smoked at least 100 cigarettes during their lifetime (regions 1-3), or that they were current smokers (regions 4 and 5) (n = 1,992). Completed questionnaires were returned by mail, with one reminder. The number of participants in the smoking sub-study was 1,746 (91% response rate). Plasma cotinine was analyzed for those who identified themselves as daily smokers during the main FINRISK data collection and responded to the tobacco-specific questionnaire<sup>7</sup>.

Altogether 218 subjects from FINRISK 1992 and FINRISK 2007 were included in the GWAS discovery phase, with genome-wide genotype data generated with the Illumina HumanOmniExpress BeadChip (Illumina, Inc., San Diego, CA, USA). These samples belong to the Predict-CVD sub-cohort, which is a random subset of the whole FINRISK cohort, and has been previously described by Ganna and colleagues<sup>8</sup>. The Predict CVD -sample is enriched for individuals with a diagnosed cardiovascular event (coronary heart disease and/or ischemic stroke). The participants originate from FINRISK cohorts collected on 1992, 1997,

2002 and 2007. The size of sub-cohort in each stratum was made proportional to the number of incident cardiovascular disease cases in the corresponding stratum.

In the replication phase 620 additional subjects from FINRISK 2007 were included, with genotype data for the top loci extracted from genotype data generated with the MetaboChip. The MetaboChip is a custom Illumina iSelect genotyping array designed to test ~200,000 SNPs of interest for metabolic and atherosclerotic / cardiovascular disease traits. Content on the chip was selected on the basis of large scale meta-analysis of relevant traits (including up to 100,000 individuals) and of HapMap and 1000 Genomes Project SNP content. Due to the sparse SNP coverage of the MetaboChip, no imputation was performed. These samples belong to the DILGOM sample, which is an extension of the FINRISK 2007 survey consisting of individuals of 25-74 years age who participated in the Dietary, Lifestyle and Genetic determinants of Obesity and Metabolic syndrome study which was carried out in Helsinki/Vantaa region in Southern Finland.

The FINRISK studies were approved by the Ethical Committee of the Hospital District of Helsinki and Uusimaa. All the surveys were conducted according to the ethical rules of the National Public Health Institute, and the investigations were performed in accordance with the Declaration of Helsinki. All participants gave their written informed consent prior to participation in the study.

*Cotinine assessment:* Plasma cotinine from fasting blood samples was analysed with a gas chromatograph-mass spectrometer (GC-MS) at the National Institute for Health and Welfare, Helsinki, Finland as previously described in detail <sup>6,7</sup>.

*Acknowledgements:* FINRISK has been primarily funded by budgetary funds of THL (National Institute for Health and Welfare). Important additional funding has been obtained from the Academy of Finland (grant number 139635 for VS) and from the Finnish

Foundation for Cardiovascular Research. Antti-Pekka Sarin and Samuli Ripatti are acknowledged for genotype imputation and post-imputation quality controls.

### **Framingham**

*Study description:* In 1948, the researchers recruited 5,209 men and women between the ages of 30 and 62 from the town of Framingham, Massachusetts, and began the first round of extensive physical examinations and lifestyle interviews that they would later analyze for common patterns related to CVD development. Since 1948, the subjects have returned to the study every two years for an examination consisting of a detailed medical history, physical examination, and laboratory tests, and in 1971, the study enrolled a second-generation cohort -- 5,124 of the original participants' adult children and their spouses -- to participate in similar examinations. The second examination of the Offspring cohort occurred eight years after the first examination, and subsequent examinations have occurred approximately every four years thereafter. In April 2002 the Study entered a new phase: the enrolment of a third generation of participants, the grandchildren of the original cohort. The first examination of the Third Generation Study was completed in July 2005 and involved 4,095 participants. Thus, the FHS has evolved into a prospective, community-based, three generation family study. The FHS is a joint project of the National Heart, Lung and Blood Institute and Boston University. Part of the FHS subjects participated in a plasma metabolite sub-study. Data used in our study were extracted from this metabolite profiling study.

*Cotinine assessment:* Cotinine was assayed from plasma samples using liquid chromatography-tandem mass spectrometry (LC-MS) with a 4000 QTRAP triple quadrupole mass spectrometer (Applied Biosystems/Sciex) that was coupled to a multiplexed LC system comprised of two 1200 Series pumps (Agilent Technologies) and an HTS PAL autosampler (Leap Technologies) equipped with two injection ports and a column selection valve<sup>9</sup>.



*Acknowledgements:* The Framingham Heart Study is conducted and supported by the National Heart, Lung, and Blood Institute (NHLBI) in collaboration with Boston University (Contract No. N01-HC-25195). This manuscript was not prepared in collaboration with investigators of the Framingham Heart Study and does not necessarily reflect the opinions or views of the Framingham Heart Study, Boston University, or NHLBI. Funding for SHARe Affymetrix genotyping was provided by NHLBI Contract N02-HL-64278. SHARe Illumina genotyping was provided under an agreement between Illumina and Boston University. Funding support for the Framingham Metabolomics (HILIC - Installment 2) dataset was provided by NIH grant R01 DK081572.

### **GenMets/Health2000**

*Study description:* The Health2000 study is a nationally representative sample of adult Finnish population, which includes a total of 8,028 subjects aged 30 or over. They were invited for an in-person study during which a blood sample was taken for cotinine measures and for DNA extraction. A detailed smoking history as described by Keskitalo and colleagues<sup>10</sup> was obtained. Altogether 485 subjects from GenMets were included in the GWAS discovery phase, with genome-wide genotype data generated with the Human610-Quad BeadChip (Illumina, Inc., San Diego, CA, USA). All participants gave written informed consent, and the study was approved by the Ethics Committee for Epidemiology and Public Health of the Hospital District of Helsinki and Uusimaa, Finland.

*Cotinine assessment:* The cotinine concentration (ng/ml) was determined from the serum using liquid-phase radioimmunoassay methodology (Nicotine Metabolite DOUBLE ANTIBODY kit, Diagnostic Products Corporation, Los Angeles, CA, USA).

*Acknowledgements:* GENMETS is a subsample of the Health 2000 Study. The Health 2000 Study is funded by the National Institute for Health and Welfare (THL), the Finnish Centre

for Pensions (ETK), The Social Insurance Institution of Finland (KELA), The Local Government Pensions Institution (KEVA) and other organizations listed on the website of the survey (<http://www.terveys2000.fi>). GWAS genotyping was supported by the Wellcome Trust Sanger Institute. Antti-Pekka Sarin and Samuli Ripatti are acknowledged for genotype imputation and post-imputation quality controls.

## **MESA**

*Study description:* The MESA (Multi-Ethnic Study of Atherosclerosis) <sup>11</sup> is a multicenter prospective cohort study to investigate the prevalence, correlates, and progression of subclinical cardiovascular disease in persons without clinical cardiovascular disease. In 2000 to 2002, MESA recruited 6,814 men and women aged 45 to 84 years from 6 U.S. communities: Forsyth County, North Carolina; northern Manhattan and Bronx, New York; Baltimore and Baltimore County, Maryland; St. Paul, Minnesota; Chicago, Illinois; and Los Angeles, California. Exclusion criteria included clinical cardiovascular disease, body weight greater than 300 lb, pregnancy, or impediment to long-term participation.

*Cotinine assessment:* Cotinine was assayed from urine samples using immunoassay (Immulite 2000 Nicotine Metabolite Assay, Diagnostic Products, Los Angeles, California) at the National Institute for Occupational Safety and Health Core Laboratory. The minimum detectable concentration was 10 ng/ml.

*Acknowledgements:* MESA and the MESA SHARe project are conducted and supported by the National Heart, Lung, and Blood Institute (NHLBI) in collaboration with MESA investigators. Support for MESA is provided by contracts N01-HC- 95159, N01-HC-95160, N01-HC-95161, N01-HC-95162, N01-HC-95163, N01-HC-95164, N01-HC-95165, N01-HC-95166, N01-HC-95167, N01-HC-95168, N01-HC-95169 and CTSA UL1-RR 024156. Funding for SHARe genotyping was provided by NHLBI Contract N02-HL-64278.

Genotyping was performed at Affymetrix (Santa Clara, California, USA) and the Broad Institute of Harvard and MIT (Boston, Massachusetts, USA) using the Affymetric Genome-Wide Human SNP Array 6.0. Funding support for the Lung CT dataset was provided by grant HL077612-05A1.

## **NESDA**

*Study description:* The Netherlands Study of Depression and Anxiety (NESDA) is an ongoing cohort study into the long-term course and consequences of depressive and anxiety disorders. A description of the study rationale, design and methods is given elsewhere <sup>12</sup>. Briefly, in 2004 2,007 participants aged 18–65 years were recruited from the community (19%), general practice (54%) and secondary mental health care (27%). A total of 2,981 participants were included, consisting of persons with a current or past depressive and/or anxiety disorder and healthy controls. The research protocol was approved by the ethical committee of participating universities, and all respondents provided written informed consent.

*Cotinine assessment:* Fasting blood samples of NESDA participants were collected in each of the participating centers and kept frozen at -80 Celsius degrees. Cotinine concentrations were determined in the laboratory (Good Biomarker Sciences, Leiden, the Netherlands), and were assessed in blood plasma by solid phase competitive ELISA (Cotinine Direct ELISA kit, cat. no: CO096D, Calbiotech, CA, USA) according to the manufacturer's instructions. The detection limit was 1 ng/ml. Intra- and inter-assay coefficients of variation for values >2 ng/ml were >20% and >15%, respectively.

*Acknowledgements:* Funding was obtained from the Netherlands Organization for Scientific Research (Geestkracht program grant 10-000-1002); the Center for Medical Systems Biology

(CSMB, NWO Genomics), Biobanking and Biomolecular Resources Research Infrastructure (BBMRI-NL), VU University's Institutes for Health and Care Research (EMGO+) and Neuroscience Campus Amsterdam, University Medical Center Groningen, Leiden University Medical Center, National Institutes of Health (NIH, R01D0042157-01A, MH081802, Grand Opportunity grants 1RC2 MH089951 and 1RC2 MH089995). Part of the genotyping and analyses were funded by the Genetic Association Information Network (GAIN) of the Foundation for the National Institutes of Health. Computing was supported by BiG Grid, the Dutch e-Science Grid, which is financially supported by NWO.

## **NTR**

*Study description:* The Netherlands Twin Register (NTR) includes a longitudinal study of health, medication use, addiction, lifestyle and personality among adolescent and adult participants. Since 1986, data were collected every two years in more than 33,000 twins and their family members, i.e., siblings, spouses, parents and offspring of twins<sup>13, 14, 15, 16</sup>. The study protocol was approved by Central Ethics Committee on Research Involving Human Subjects of the VU University Medical Center, Amsterdam, an Institutional Review Board certified by the US Office of Human Research Protections (IRB number IRB-2991 under Federal-wide Assurance-3703; IRB/institute codes, NTR 03-180). All participants provided informed consent.

*Cotinine assessment:* Cotinine was assessed in blood plasma. Fasting blood samples were collected during a home visit between 7:00 and 10:00 AM and stored at  $-27^{\circ}\text{C}$ . Cotinine assessment was carried out by using the Cotinine Direct ELISA kit, (cat.no: CO096D, Calbiotech, CA, USA) following manufacturer's instructions. For cotinine values in the 2-10 ng/ml range we used a threshold of 20% for the inter-assay coefficient of variation, whereas

for values exceeding 10 ng/ml the threshold was 15%. Values below 1 ng/ml were treated as undetectable.

*Acknowledgements:* We thank the Netherlands Twin Register participants whose data were analyzed in this study. We acknowledge the Netherlands Organisation for Scientific Research (NWO) and the Netherlands Organisation for Health Research and Development (ZonMW), the EMGO+ Institute for Health and Care Research, the Neuroscience Campus Amsterdam, BBMRI – NL (184.021.007: Biobanking and Biomolecular Resources Research Infrastructure), and the European Research Council (230374, 284167) for support. Genotyping was funded in part by grants from the National Institutes of Health (4R37DA018673-06, RC2 MH089951).

## **TwinsUK**

*Study description:* Study subjects were twins enrolled in the TwinsUK registry, a national register of adult twins. Twins were recruited as volunteers by successive media campaigns without selecting for particular diseases or traits<sup>17</sup>. In this study we analysed data from 674 female twins who cotinine data available. The study was approved by St. Thomas' Hospital Research Ethics Committee, and all twins provided informed written consent.

*Cotinine assessment:* Cotinine levels in TwinsUK were measured using a non-targeted mass spec-based metabolomic profiling using the Metabolon platform, as described previously<sup>18</sup>. Metabolomic profiling was done in three batches. The raw cotinine levels were median-normalised (dividing each cotinine concentration by the day cotinine median), then inverse normalised as the metabolite concentration was not normally distributed. To measure the correlation between Metabolon platform and LCMS method described in<sup>5</sup>, 12 samples were analysed with both methods.

*Acknowledgements:* TwinsUK was funded by the Wellcome Trust; European Community's Seventh Framework Programme (FP7/2007-2013). The study also receives support from the National Institute for Health Research (NIHR) BioResource Clinical Research Facility and Biomedical Research Centre based at Guy's and St Thomas' NHS Foundation Trust and King's College London. SNP Genotyping was performed by The Wellcome Trust Sanger Institute and National Eye Institute via NIH/CIDR.

## **YFS**

*Study description:* The Cardiovascular Risk in Young Finns Study (YFS)<sup>19</sup> is a 5-center follow-up study of atherosclerosis risk factors in Finnish children and adolescents (<http://med.utu.fi/cardio/youngfinnsstudy/>). The first cross-sectional survey was conducted in 1980. Altogether 4,320 children and adolescents aged 3, 6, 9, 12, 15, and 18 years, randomly chosen from the national register, were enrolled. There were 3,596 participants (83.2% participation rate) in 1980. Follow-up studies were conducted 3 years apart, in 1983 and 1986. In 2001, we re-examined these individuals, who had then reached the age of 24 to 39 years. In 2001, genomic DNA was extracted from peripheral blood leukocytes. The loss of participants to follow-up was approximately 20%, 30%, and 34% after 3, 6, and 21 years, respectively. In adulthood, the latest 27-year follow-up study was conducted in 2007 (ages 30-45 years) with 2,204 participants. Smoking habits were determined using a questionnaire in participants aged 21 years or older. In 12- to 18-year-olds, the information on smoking habits was collected in connection with the medical examination. The study was approved by the local ethics committees (the University Hospitals of Helsinki, Turku, Tampere, Kuopio and Oulu) and was conducted following the guidelines of the Declaration of Helsinki. All participants gave their written informed consent.

*Cotinine assessment:* Serum samples were sent for cotinine measurement to University of Toronto (Dr. Rachel Tyndale). Samples were assessed by LCMS as previously described <sup>5</sup>.

*Acknowledgements:* The Young Finns Study has been financially supported by the Academy of Finland: grants 134309 (Eye), 126925, 121584, 124282, 129378 (Salve), 117787 (Gendi), and 41071 (Skidi), the Social Insurance Institution of Finland, Kuopio, Tampere and Turku University Hospital Medical Funds (grant 9M048 and 9N035 for T. Lehtimäki), Juho Vainio Foundation, Paavo Nurmi Foundation, Finnish Foundation of Cardiovascular Research and Finnish Cultural Foundation, Tampere Tuberculosis Foundation and Emil Aaltonen Foundation (for T. Lehtimäki). The expert technical assistance in the statistical analyses by Ville Aalto and Irina Lisinen is gratefully acknowledged. Antti-Pekka Sarin and Samuli Ripatti are acknowledged for genotype imputation and post-imputation quality controls. Cotinine assessment was supported by the Canadian Institutes of Health Research (TMH109787) and NIH (PGRN DA020830) to Rachel Tyndale.

## References

1. Boyd A, *et al.* Cohort Profile: the 'children of the 90s'--the index offspring of the Avon Longitudinal Study of Parents and Children. *International journal of epidemiology* **42**, 111-127 (2013).
2. Haley NJ, Axelrad CM, Tilton KA. Validation of self-reported smoking behavior: biochemical analyses of cotinine and thiocyanate. *American journal of public health* **73**, 1204-1207 (1983).
3. Van Vunakis H, Gjika HB, Langone JJ. Radioimmunoassay for nicotine and cotinine. *IARC scientific publications*, 317-330 (1987).
4. Hamidovic A, *et al.* Gene-centric analysis of serum cotinine levels in African and European American populations. *Neuropsychopharmacology : official publication of the American College of Neuropsychopharmacology* **37**, 968-974 (2012).
5. St Helen G, *et al.* Reproducibility of the nicotine metabolite ratio in cigarette smokers. *Cancer epidemiology, biomarkers & prevention : a publication of the American Association for Cancer Research, cosponsored by the American Society of Preventive Oncology* **21**, 1105-1114 (2012).



6. Vartiainen E, Seppala T, Lillsunde P, Puska P. Validation of self reported smoking by serum cotinine measurement in a community-based study. *Journal of epidemiology and community health* **56**, 167-170 (2002).
7. Broms U, *et al.* Diurnal Evening Type is Associated with Current Smoking, Nicotine Dependence and Nicotine Intake in the Population Based National FINRISK 2007 Study. *Journal of addiction research & therapy* **S2**, (2012).
8. Ganna A, *et al.* Utilizing twins as controls for non-twin case-materials in genome wide association studies. *PloS one* **8**, e83101 (2013).
9. Wang TJ, *et al.* Metabolite profiles and the risk of developing diabetes. *Nature medicine* **17**, 448-453 (2011).
10. Keskitalo K, *et al.* Association of serum cotinine level with a cluster of three nicotinic acetylcholine receptor genes (CHRNA3/CHRNA5/CHRNA4) on chromosome 15. *Human molecular genetics* **18**, 4007-4012 (2009).
11. Bild DE, *et al.* Multi-ethnic study of atherosclerosis: objectives and design. *American journal of epidemiology* **156**, 871-881 (2002).

12. Penninx BW, *et al.* The Netherlands Study of Depression and Anxiety (NESDA): rationale, objectives and methods. *International journal of methods in psychiatric research* **17**, 121-140 (2008).
13. Boomsma DI, *et al.* Netherlands Twin Register: from twins to twin families. *Twin Research and Human Genetics* **9**, 849-857 (2006).
14. Boomsma DI, *et al.* Netherlands Twin Register: a focus on longitudinal research. *Twin Research* **5**, 401-406 (2002).
15. Willemsen G, *et al.* The Netherlands Twin Register biobank: a resource for genetic epidemiological studies. *Twin Research and Human Genetics* **13**, 231-245 (2010).
16. Willemsen G, *et al.* The Adult Netherlands Twin Register: twenty-five years of survey and biological data collection. *Twin Research and Human Genetics* **16**, 271-281 (2013).
17. Moayyeri A, Hammond CJ, Valdes AM, Spector TD. Cohort Profile: TwinsUK and healthy ageing twin study. *International journal of epidemiology* **42**, 76-85 (2013).
18. Shin SY, *et al.* An atlas of genetic influences on human blood metabolites. *Nature genetics* **46**, 543-550 (2014).

19. Raitakari OT, *et al.* Cohort profile: the cardiovascular risk in Young Finns Study. *International journal of epidemiology* **37**, 1220-1226 (2008).

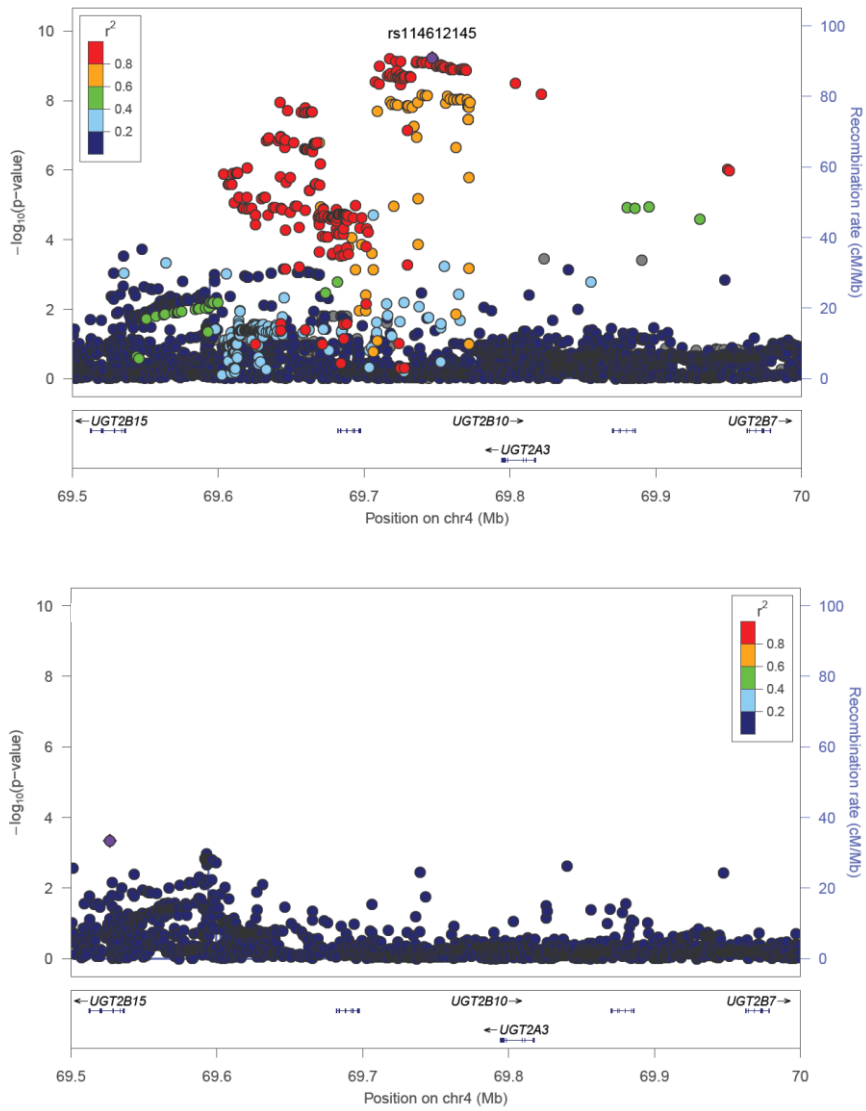

Figure S1. Chromosome 4 conditional analyses. Panels illustrate regional association plots of 4q13.2 region (69.5 to 70MB) based on the original results (top), and after conditioning on top hit rs114612145 (bottom). SNPs plotted by their position on chromosome 4 against  $-\log_{10} p$ -value for their association with cotinine level in genome-wide meta-analysis. The ALSPAC mothers cohort (n=8,890) was used as an LD reference panel for these analyses.

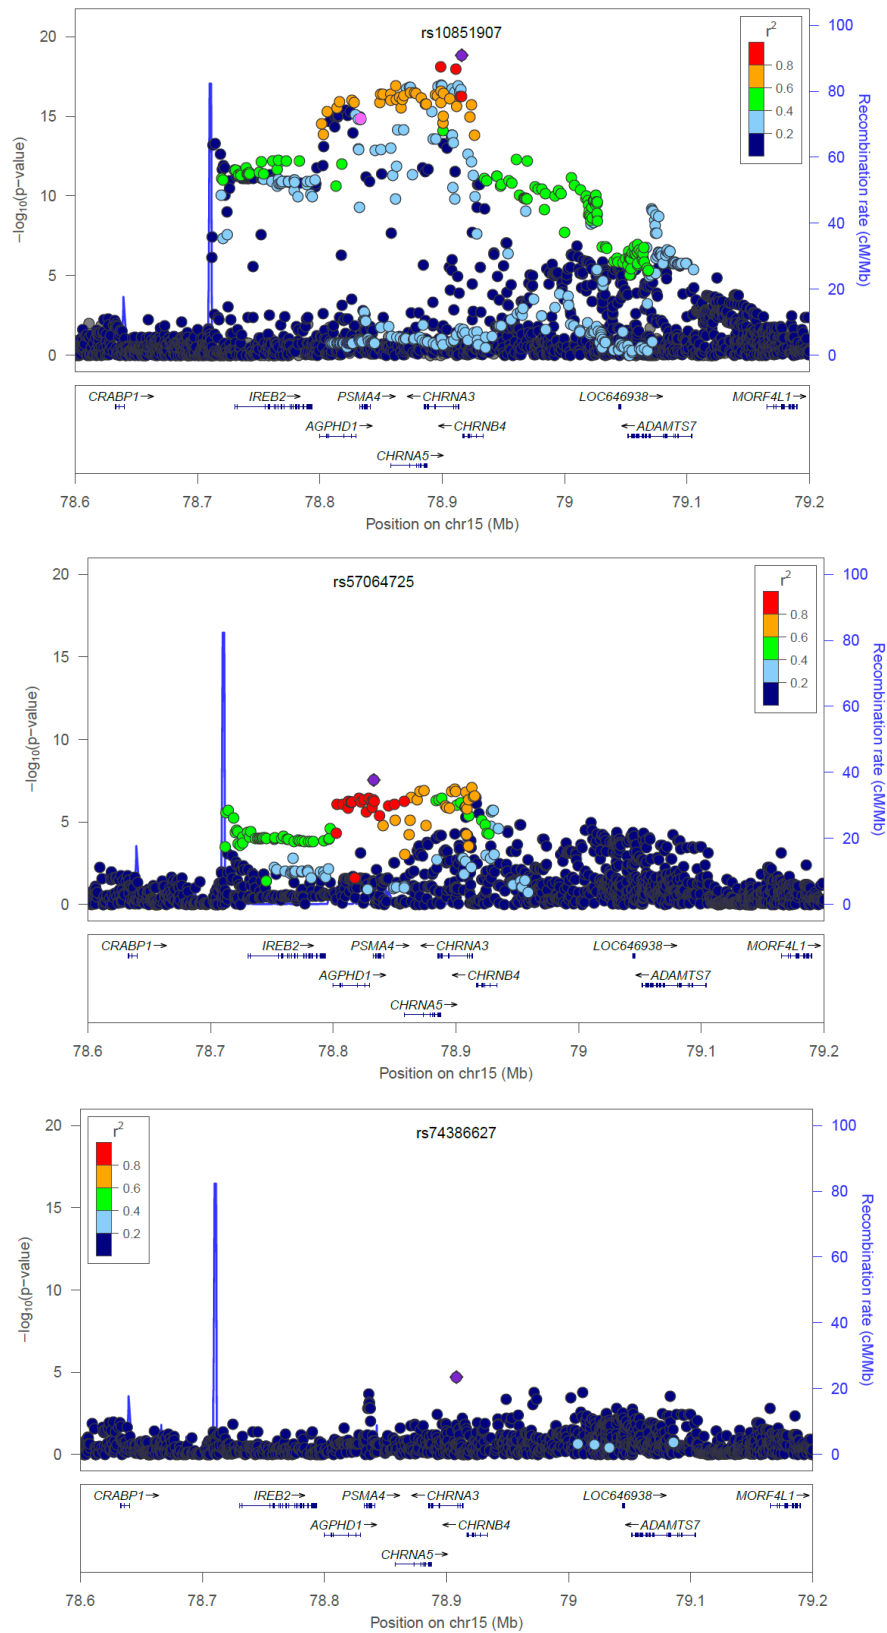

Figure S2. Chromosome 15 conditional analyses. Panels illustrate regional association plots of 15q25 region based on the original results (top), after conditioning on top hit rs10851907 (middle), and after conditioning on both rs10851907 and second independent signal rs57064725 (bottom). SNP rs57064725 is highlighted in pink in the top panel for reference. SNPs plotted by their position

on chromosome 15 against  $-\log_{10} p$ -value for their association with cotinine level in genome-wide meta-analysis. The ALSPAC mothers cohort (n=8,890) was used as an LD reference panel for these analyses.

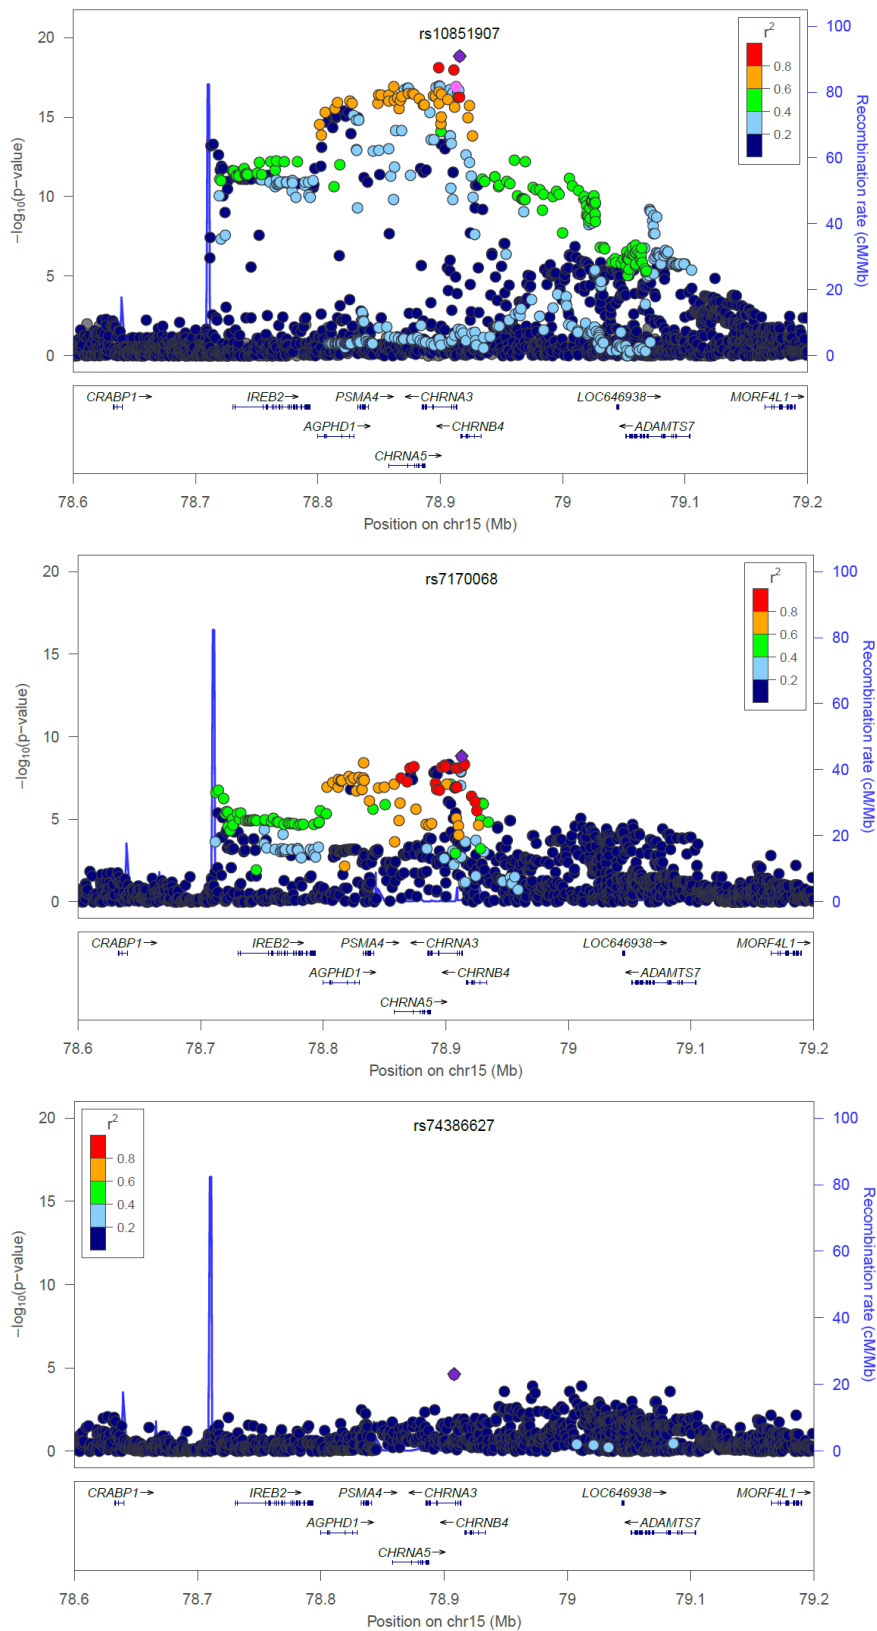

Figure S3. Chromosome 15 conditional analyses using rs16969968, which codes for D398N. Panels illustrate regional association plots of 15q25 region based on the original results (top), after conditioning on rs16969968 (middle), and after conditioning on both rs16969968 and second independent signal rs7170068 (bottom). SNP rs7170068 is highlighted in pink in the top panel for reference. SNPs plotted by their position on chromosome 15 against  $-\log_{10} p$ -value for their association with cotinine level in genome-wide meta-analysis. The ALSPAC mothers cohort ( $n=8,890$ ) was used as an LD reference panel for these analyses.

Table S1. Genotyping, imputation and statistical analysis for contributing studies.

| Study                 | Genotyping                                                                                            |                    |             |                      |                      | Imputation          |                    |                    | Association analyses  |                |
|-----------------------|-------------------------------------------------------------------------------------------------------|--------------------|-------------|----------------------|----------------------|---------------------|--------------------|--------------------|-----------------------|----------------|
|                       | Platform                                                                                              | Inclusion criteria |             |                      | SNPs met QC criteria | Imputation software | Inclusion criteria |                    | SNPs in meta-analysis | $\lambda_{GC}$ |
|                       |                                                                                                       | MAF                | Call rate   | P HWE                |                      |                     | MAF                | Imputation quality |                       |                |
| ALSPAC                | Illumina Human Hap 550-quad                                                                           | $\geq 1\%$         | $\geq 95\%$ | $> 5 \times 10^{-7}$ | 500,527              | Minimac             | $> 1\%$            | $R^2 > 0.3$        | 7,999,998             | 0.993          |
| CARDIA                | Affy 6.0                                                                                              | $> 1\%$            | $> 99\%$    | $> 5 \times 10^{-6}$ | 720,483              | IMPUTE 2            | $> 1\%$            | Info $> 0.4$       | 8,227,647             | 1.005          |
| FinnTwin <sup>a</sup> | Illumina 670K                                                                                         | $> 1\%$            | $> 95\%$    | $> 1 \times 10^{-6}$ | 504,770 <sup>a</sup> | IMPUTE 2.2.2        | $> 1\%$            | Info $> 0.4$       | 8,585,905             | 1.006          |
| FINRISK               | Illumina HumanOmniExpress                                                                             | $> 1\%$            | $> 95\%$    | $> 1 \times 10^{-6}$ | 645,088              | IMPUTE              | $> 1\%$            | Info $> 0.4$       | 6,030,573             | 1.025          |
| Framingham            | Affy 5.0                                                                                              | $> 1\%$            | $> 99\%$    | $> 5 \times 10^{-6}$ | 500,571              | IMPUTE 2            | $> 1\%$            | Info $> 0.4$       | 8,192,669             | 1.027          |
| GenMets               | Illumina 610K                                                                                         | $> 1\%$            | $> 95\%$    | $> 1 \times 10^{-6}$ | 555,388              | IMPUTE              | $> 1\%$            | Info $> 0.4$       | 8,520,923             | 1.011          |
| MESA                  | Affy 6.0                                                                                              | $> 1\%$            | $> 99\%$    | $> 5 \times 10^{-6}$ | 579,750              | IMPUTE 2            | $> 1\%$            | Info $> 0.4$       | 8,466,568             | 1.009          |
| NESDA                 | Perlegen-Affymetrix 5.0;<br>Affymetrix 6.0 907K                                                       | $> 1\%$            | $\geq 90\%$ | $> 1 \times 10^{-5}$ | 250,000–1.1M         | MACH 1.0            | $> 1\%$            | Info $> 0.4$       | 7,391,758             | 1.022          |
| NTR                   | Perlegen-Affymetrix 5.0;<br>Illumina 660K; Illumina 370K;<br>Affymetrix 6.0 907K; Illumina<br>Omni 1M | $> 1\%$            | $\geq 90\%$ | $> 1 \times 10^{-5}$ | 250,000-1.1M         | MACH 1.0            | $> 1\%$            | Info $> 0.4$       | 5,253,422             | 0.995          |
| TwinsUK               | Illumina 317K+610K                                                                                    | $\geq 1\%$         | $\geq 95\%$ | $> 5 \times 10^{-6}$ | 281,269              | IMPUTE 2.2.0        | $> 1\%$            | Info $> 0.4$       | 8,392,704             | 1.012          |
| YFS                   | Illumina 670K                                                                                         | $\geq 1\%$         | $\geq 95\%$ | $> 1 \times 10^{-6}$ | 546,677              | IMPUTE 2.1.2        | $> 1\%$            | Info $> 0.4$       | 8,583,652             | 0.997          |

<sup>a</sup>FinnTwin comprised three sub-samples, which contributed 549,060, 549,544, and 504,770 directly genotyped variants respectively. MAF: minor allele frequency; QC: quality control; GC: genomic control.



Table S2. Summary information for all SNPs reaching or exceeding level of genome-wide significance.

| SNP         | Chr:Position | Gene                       | A1 | A2 | Freq A1 | Beta    | SE     | p value  | n    |
|-------------|--------------|----------------------------|----|----|---------|---------|--------|----------|------|
| rs10851907  | 15:78915864  | Intergenic (CHRNA3/CHRNA4) | a  | g  | 0.4062  | 0.1862  | 0.0206 | 1.46E-19 | 4330 |
| rs12914385  | 15:78898723  | CHRNA3                     | t  | c  | 0.3807  | 0.1837  | 0.0207 | 7.12E-19 | 4330 |
| rs8040868   | 15:78911181  | CHRNA3                     | t  | c  | 0.6123  | -0.1819 | 0.0206 | 9.96E-19 | 4330 |
| rs7183604   | 15:78899213  | CHRNA3                     | t  | c  | 0.2419  | -0.2058 | 0.024  | 1.02E-17 | 4330 |
| rs7170068   | 15:78912943  | CHRNA3                     | a  | g  | 0.2239  | -0.2142 | 0.025  | 1.13E-17 | 4330 |
| rs11633958  | 15:78862064  | CHRNA5                     | t  | c  | 0.3307  | 0.2218  | 0.0259 | 1.15E-17 | 3433 |
| rs11637630  | 15:78899719  | CHRNA3                     | a  | g  | 0.7591  | 0.205   | 0.024  | 1.20E-17 | 4330 |
| rs938682    | 15:78896547  | CHRNA3                     | a  | g  | 0.759   | 0.2048  | 0.024  | 1.24E-17 | 4330 |
| rs569207    | 15:78873119  | CHRNA5                     | a  | g  | 0.2409  | -0.2043 | 0.0239 | 1.38E-17 | 4330 |
| rs637137    | 15:78873976  | CHRNA5                     | a  | t  | 0.2409  | -0.2043 | 0.0239 | 1.41E-17 | 4330 |
| rs576982    | 15:78870803  | CHRNA5                     | t  | c  | 0.2381  | -0.2065 | 0.0243 | 1.73E-17 | 4330 |
| rs8042494   | 15:78908010  | CHRNA3                     | t  | c  | 0.2397  | -0.2044 | 0.024  | 1.74E-17 | 4330 |
| rs6495309   | 15:78915245  | CHRNA3                     | t  | c  | 0.2293  | -0.2069 | 0.0244 | 1.94E-17 | 4330 |
| rs55676755  | 15:78898932  | CHRNA3                     | c  | g  | 0.6649  | -0.1815 | 0.0214 | 2.51E-17 | 4330 |
| rs13329271  | 15:78914230  | CHRNA3                     | a  | c  | 0.7695  | 0.2064  | 0.0244 | 2.71E-17 | 4330 |
| rs3825845   | 15:78910258  | CHRNA3                     | t  | c  | 0.2334  | -0.2055 | 0.0243 | 2.82E-17 | 4330 |
| rs56390833  | 15:78877381  | CHRNA5                     | a  | c  | 0.3331  | 0.1809  | 0.0214 | 3.04E-17 | 4330 |
| rs7180002   | 15:78873993  | CHRNA5                     | a  | t  | 0.6656  | -0.1803 | 0.0213 | 3.05E-17 | 4330 |
| rs114205691 | 15:78901113  | CHRNA3                     | t  | c  | 0.3368  | 0.181   | 0.0215 | 3.42E-17 | 4330 |
| rs951266    | 15:78878541  | CHRNA5                     | t  | c  | 0.3346  | 0.1799  | 0.0213 | 3.44E-17 | 4330 |
| rs55853698  | 15:78857939  | CHRNA5                     | t  | g  | 0.6596  | -0.183  | 0.0217 | 3.83E-17 | 4330 |
| rs72740955  | 15:78849779  | Intergenic (PSMA4/CHRNA5)  | t  | c  | 0.3378  | 0.1825  | 0.0217 | 4.00E-17 | 4330 |
| rs2036527   | 15:78851615  | Intergenic (PSMA4/CHRNA5)  | a  | g  | 0.3382  | 0.1823  | 0.0217 | 4.01E-17 | 4330 |
| rs1051730   | 15:78894339  | CHRNA3                     | a  | g  | 0.3345  | 0.18    | 0.0214 | 4.15E-17 | 4330 |
| rs1317286   | 15:78896129  | CHRNA3                     | a  | g  | 0.6638  | -0.1801 | 0.0215 | 4.69E-17 | 4330 |
| rs72740964  | 15:78868636  | CHRNA5                     | a  | g  | 0.3349  | 0.1798  | 0.0214 | 4.79E-17 | 4330 |
| rs55958997  | 15:78915872  | Intergenic (CHRNA3/CHRNA4) | a  | c  | 0.3626  | 0.1784  | 0.0213 | 5.10E-17 | 4330 |
| rs8039449   | 15:78914534  | CHRNA3                     | t  | c  | 0.3634  | 0.1778  | 0.0212 | 5.30E-17 | 4330 |
| rs17486195  | 15:78865197  | CHRNA5                     | a  | g  | 0.6624  | -0.1805 | 0.0216 | 5.68E-17 | 4330 |
| rs16969968  | 15:78882925  | CHRNA5                     | a  | g  | 0.3343  | 0.1787  | 0.0214 | 6.91E-17 | 4330 |
| rs146009840 | 15:78906177  | CHRNA3                     | a  | t  | 0.6659  | -0.1796 | 0.0215 | 7.39E-17 | 4330 |
| rs17486278  | 15:78867482  | CHRNA5                     | a  | c  | 0.6546  | -0.1802 | 0.0216 | 8.01E-17 | 4330 |
| rs7172118   | 15:78862453  | CHRNA5                     | a  | c  | 0.3371  | 0.18    | 0.0216 | 8.36E-17 | 4330 |
| rs931794    | 15:78826180  | AGPHD1                     | a  | g  | 0.6581  | -0.1772 | 0.0213 | 8.89E-17 | 4330 |
| rs55781567  | 15:78857986  | CHRNA5                     | c  | g  | 0.6573  | -0.1811 | 0.0218 | 9.16E-17 | 4330 |
| rs8031948   | 15:78816057  | AGPHD1                     | t  | g  | 0.3395  | 0.1767  | 0.0213 | 1.16E-16 | 4330 |
| rs56077333  | 15:78899003  | CHRNA3                     | a  | c  | 0.3177  | 0.1854  | 0.0224 | 1.29E-16 | 4330 |
| rs72738786  | 15:78828086  | AGPHD1                     | t  | g  | 0.3387  | 0.178   | 0.0215 | 1.30E-16 | 4330 |
| rs58365910  | 15:78849034  | Intergenic (PSMA4/CHRNA5)  | t  | c  | 0.6579  | -0.1798 | 0.0217 | 1.36E-16 | 4330 |
| rs4887067   | 15:78886947  | CHRNA3/CHRNA5              | a  | g  | 0.3349  | 0.1769  | 0.0214 | 1.56E-16 | 4330 |
| rs8192482   | 15:78886198  | CHRNA3/CHRNA5              | t  | c  | 0.3348  | 0.1768  | 0.0214 | 1.58E-16 | 4330 |
| rs17487223  | 15:78923987  | CHRNA4                     | a  | g  | 0.3552  | 0.1747  | 0.0212 | 1.73E-16 | 4330 |
| rs4243084   | 15:78911672  | CHRNA3                     | c  | g  | 0.3418  | 0.176   | 0.0214 | 2.25E-16 | 4330 |
| rs140330585 | 15:78866445  | CHRNA5                     | a  | g  | 0.3391  | 0.1758  | 0.0215 | 2.90E-16 | 4330 |
| rs10519203  | 15:78814046  | AGPHD1                     | t  | c  | 0.6597  | -0.1742 | 0.0213 | 2.90E-16 | 4330 |
| rs12441354  | 15:78821016  | AGPHD1                     | a  | g  | 0.2314  | -0.1984 | 0.0244 | 4.01E-16 | 4330 |

|             |             |                           |   |   |        |         |        |          |      |
|-------------|-------------|---------------------------|---|---|--------|---------|--------|----------|------|
| rs8034191   | 15:78806023 | AGPHD1                    | t | c | 0.6584 | -0.1725 | 0.0212 | 4.66E-16 | 4330 |
| rs12438659  | 15:78824924 | AGPHD1                    | a | g | 0.2316 | -0.1977 | 0.0244 | 4.87E-16 | 4330 |
| rs12910984  | 15:78891627 | CHRNA3                    | a | g | 0.7582 | 0.1993  | 0.0246 | 5.02E-16 | 4072 |
| rs12439240  | 15:78829091 | AGPHD1                    | t | c | 0.7782 | 0.2103  | 0.0261 | 7.28E-16 | 4330 |
| rs7169584   | 15:78822660 | AGPHD1                    | a | t | 0.7686 | 0.196   | 0.0244 | 8.24E-16 | 4330 |
| rs7163730   | 15:78814681 | AGPHD1                    | a | g | 0.7686 | 0.1961  | 0.0244 | 8.58E-16 | 4330 |
| rs61204066  | 15:78815298 | AGPHD1                    | a | g | 0.2315 | -0.196  | 0.0244 | 8.64E-16 | 4330 |
| rs12441426  | 15:78812329 | AGPHD1                    | t | c | 0.7685 | 0.1962  | 0.0244 | 9.05E-16 | 4330 |
| rs147144681 | 15:78900908 | CHRNA3                    | t | c | 0.3088 | 0.1847  | 0.023  | 9.42E-16 | 4330 |
| rs7181245   | 15:78814389 | AGPHD1                    | t | c | 0.2316 | -0.1957 | 0.0244 | 9.60E-16 | 4330 |
| rs7181447   | 15:78814567 | AGPHD1                    | a | g | 0.7683 | 0.1956  | 0.0244 | 9.93E-16 | 4330 |
| rs3813570   | 15:78832832 | PSMA4                     | t | c | 0.777  | 0.2087  | 0.026  | 1.02E-15 | 4330 |
| rs2869548   | 15:78922638 | CHRN4                     | a | g | 0.3584 | 0.2055  | 0.0256 | 1.09E-15 | 3433 |
| rs57064725  | 15:78833036 | PSMA4                     | a | c | 0.248  | -0.2422 | 0.0303 | 1.33E-15 | 3433 |
| rs59683676  | 15:78833453 | PSMA4                     | t | c | 0.7769 | 0.2079  | 0.0261 | 1.51E-15 | 4330 |
| rs59133824  | 15:78833450 | PSMA4                     | a | c | 0.223  | -0.2081 | 0.0261 | 1.51E-15 | 4330 |
| rs34664138  | 15:78831624 | PSMA4                     | t | g | 0.7799 | 0.2085  | 0.0261 | 1.53E-15 | 4330 |
| rs28437878  | 15:78807872 | AGPHD1                    | t | c | 0.232  | -0.1939 | 0.0244 | 1.95E-15 | 4330 |
| rs141518190 | 15:78900647 | CHRNA3                    | a | g | 0.6998 | -0.1859 | 0.0235 | 2.59E-15 | 4330 |
| rs147499554 | 15:78900650 | CHRNA3                    | t | c | 0.3002 | 0.1859  | 0.0235 | 2.59E-15 | 4330 |
| rs11852372  | 15:78801394 | AGPHD1                    | a | c | 0.6813 | -0.1768 | 0.0224 | 2.95E-15 | 4330 |
| rs12438181  | 15:78812098 | AGPHD1                    | a | g | 0.2268 | -0.196  | 0.025  | 4.50E-15 | 4330 |
| rs667282    | 15:78863472 | CHRNA5                    | t | c | 0.7582 | 0.2378  | 0.0305 | 6.45E-15 | 3433 |
| rs2456020   | 15:78868398 | CHRNA5                    | t | c | 0.2439 | -0.2268 | 0.0291 | 6.81E-15 | 3433 |
| rs138544659 | 15:78900701 | CHRNA3                    | t | g | 0.7072 | -0.1867 | 0.024  | 7.23E-15 | 4330 |
| rs2036534   | 15:78826948 | AGPHD1                    | t | c | 0.7669 | 0.1919  | 0.0248 | 1.09E-14 | 4072 |
| rs9788721   | 15:78802869 | AGPHD1                    | t | c | 0.6535 | -0.1638 | 0.0213 | 1.27E-14 | 4330 |
| rs72743158  | 15:78926445 | CHRN4                     | t | c | 0.6316 | -0.1982 | 0.0258 | 1.45E-14 | 3433 |
| rs8042374   | 15:78908032 | CHRNA3                    | a | g | 0.7549 | 0.2192  | 0.0285 | 1.51E-14 | 3433 |
| rs6495308   | 15:78907656 | CHRNA3                    | a | g | 0.7546 | 0.2187  | 0.0285 | 1.53E-14 | 3433 |
| rs8043009   | 15:78908154 | CHRNA3                    | c | g | 0.2453 | -0.219  | 0.0285 | 1.53E-14 | 3433 |
| rs8042059   | 15:78907859 | CHRNA3                    | a | c | 0.7547 | 0.2187  | 0.0285 | 1.55E-14 | 3433 |
| rs7177514   | 15:78907406 | CHRNA3                    | c | g | 0.7549 | 0.2184  | 0.0285 | 1.79E-14 | 3433 |
| rs3743078   | 15:78894759 | CHRNA3                    | c | g | 0.2478 | -0.2165 | 0.0284 | 2.60E-14 | 3433 |
| rs7359276   | 15:78892661 | CHRNA3                    | t | c | 0.751  | 0.217   | 0.0285 | 2.65E-14 | 3433 |
| rs4887069   | 15:78909070 | CHRNA3                    | a | g | 0.7478 | 0.2162  | 0.0286 | 4.17E-14 | 3433 |
| rs2869032   | 15:78714561 | Intergenic (IREB2)        | t | c | 0.791  | 0.191   | 0.0253 | 4.81E-14 | 4330 |
| rs7171869   | 15:78900909 | CHRNA3                    | a | g | 0.2815 | -0.1848 | 0.0245 | 4.94E-14 | 4330 |
| rs4887053   | 15:78712699 | Intergenic (IREB2)        | a | c | 0.2092 | -0.1887 | 0.0251 | 6.12E-14 | 4330 |
| rs7164594   | 15:78803057 | AGPHD1                    | t | c | 0.2379 | -0.2165 | 0.0289 | 7.26E-14 | 3433 |
| rs189218934 | 15:78903987 | CHRNA3                    | t | c | 0.3801 | -0.1911 | 0.0256 | 9.42E-14 | 4330 |
| rs503464    | 15:78857896 | CHRNA5                    | a | t | 0.2642 | -0.23   | 0.0309 | 9.76E-14 | 3433 |
| rs34138960  | 15:78831668 | PSMA4                     | a | g | 0.7685 | 0.2222  | 0.0299 | 1.05E-13 | 3433 |
| rs35212593  | 15:78831826 | PSMA4                     | a | g | 0.2314 | -0.2222 | 0.0299 | 1.12E-13 | 3433 |
| rs7173514   | 15:78849918 | Intergenic (PSMA4/CHRNA5) | t | c | 0.2438 | -0.2324 | 0.0313 | 1.13E-13 | 3433 |
| rs905739    | 15:78845110 | Intergenic (PSMA4/CHRNA5) | a | g | 0.766  | 0.2323  | 0.0314 | 1.32E-13 | 3433 |
| rs2869045   | 15:78718899 | Intergenic (IREB2)        | t | c | 0.2083 | -0.187  | 0.0255 | 2.15E-13 | 4330 |

|             |             |                             |   |   |        |         |        |          |      |
|-------------|-------------|-----------------------------|---|---|--------|---------|--------|----------|------|
| rs12593950  | 15:78920935 | CHRN4                       | c | g | 0.2409 | -0.2188 | 0.0298 | 2.30E-13 | 3433 |
| rs6495314   | 15:78960529 | Intergenic (CHRN4)          | a | c | 0.5956 | -0.15   | 0.0207 | 4.76E-13 | 4330 |
| rs1504550   | 15:78766250 | IREB2                       | a | g | 0.6736 | -0.1556 | 0.0216 | 5.46E-13 | 4330 |
| rs17484524  | 15:78772676 | IREB2                       | a | g | 0.673  | -0.1553 | 0.0216 | 5.87E-13 | 4330 |
| rs17484235  | 15:78761414 | IREB2                       | c | g | 0.6733 | -0.155  | 0.0215 | 5.94E-13 | 4330 |
| rs11858836  | 15:78783277 | IREB2                       | a | g | 0.3234 | 0.1564  | 0.0217 | 6.23E-13 | 4330 |
| rs4886580   | 15:78969385 | Intergenic (CHRN4)          | t | g | 0.6002 | -0.1499 | 0.0208 | 6.36E-13 | 4330 |
| rs28534575  | 15:78923845 | CHRN4                       | t | g | 0.759  | 0.2156  | 0.03   | 6.45E-13 | 3433 |
| rs72738732  | 15:78752188 | IREB2                       | c | g | 0.6739 | -0.1547 | 0.0215 | 6.50E-13 | 4330 |
| rs12592111  | 15:78767346 | IREB2                       | a | g | 0.5911 | 0.1537  | 0.0214 | 6.66E-13 | 4330 |
| rs8042849   | 15:78817929 | AGPHD1                      | t | c | 0.5962 | -0.1589 | 0.0223 | 9.09E-13 | 4330 |
| rs2568497   | 15:78721397 | Intergenic (IREB2)          | t | g | 0.7818 | 0.1776  | 0.025  | 1.18E-12 | 4330 |
| rs9788682   | 15:78802586 | AGPHD1                      | a | g | 0.2147 | -0.1771 | 0.0249 | 1.21E-12 | 4330 |
| rs664172    | 15:78862762 | CHRNA5                      | a | g | 0.2066 | -0.2432 | 0.0343 | 1.34E-12 | 3433 |
| rs9672608   | 15:78797463 | Intergenic (IREB2/AGPHD1)   | a | t | 0.231  | -0.1753 | 0.0248 | 1.57E-12 | 4330 |
| rs2568499   | 15:78722359 | Intergenic (IREB2)          | t | c | 0.2195 | -0.176  | 0.0249 | 1.61E-12 | 4330 |
| rs2089162   | 15:78739763 | IREB2                       | a | g | 0.6726 | -0.1527 | 0.0216 | 1.66E-12 | 4330 |
| rs518425    | 15:78883813 | CHRNA5                      | a | g | 0.7041 | 0.1912  | 0.0271 | 1.67E-12 | 3433 |
| rs72738736  | 15:78765122 | IREB2                       | t | g | 0.332  | 0.1511  | 0.0215 | 1.98E-12 | 4330 |
| rs578776    | 15:78888400 | CHRNA3                      | a | g | 0.2908 | -0.1915 | 0.0272 | 2.05E-12 | 3433 |
| rs2656055   | 15:78720194 | Intergenic (IREB2)          | a | c | 0.7832 | 0.1766  | 0.0251 | 2.14E-12 | 4330 |
| rs17405217  | 15:78731149 | IREB2                       | t | c | 0.3262 | 0.1524  | 0.0217 | 2.17E-12 | 4237 |
| rs17483548  | 15:78730313 | IREB2                       | a | g | 0.3262 | 0.1523  | 0.0217 | 2.18E-12 | 4237 |
| rs2656070   | 15:78730252 | IREB2                       | a | g | 0.2149 | -0.179  | 0.0255 | 2.26E-12 | 4330 |
| rs2938671   | 15:78732754 | IREB2                       | a | g | 0.2388 | -0.1709 | 0.0244 | 2.61E-12 | 4330 |
| rs8192477   | 15:78910463 | CHRNA3                      | c | g | 0.2588 | -0.1719 | 0.0246 | 2.73E-12 | 4330 |
| rs8192478   | 15:78910462 | CHRNA3                      | a | g | 0.7415 | 0.1719  | 0.0246 | 2.80E-12 | 4330 |
| rs564585    | 15:78886227 | CHRNA3/CHRNA5               | a | g | 0.7109 | 0.1913  | 0.0274 | 2.90E-12 | 3433 |
| rs2656065   | 15:78750549 | IREB2                       | a | g | 0.3375 | 0.1502  | 0.0215 | 3.16E-12 | 4330 |
| rs17483929  | 15:78742376 | IREB2                       | t | c | 0.3309 | 0.1493  | 0.0214 | 3.22E-12 | 4330 |
| rs56219465  | 15:78742579 | IREB2                       | a | g | 0.6691 | -0.1489 | 0.0214 | 3.76E-12 | 4330 |
| rs2009746   | 15:78754102 | IREB2                       | a | g | 0.6637 | -0.1501 | 0.0216 | 3.78E-12 | 4330 |
| rs55983731  | 15:78735269 | IREB2                       | t | c | 0.3308 | 0.1488  | 0.0214 | 3.91E-12 | 4330 |
| rs2938670   | 15:78740688 | IREB2                       | t | g | 0.6682 | -0.1488 | 0.0214 | 3.93E-12 | 4330 |
| rs2656052   | 15:78740964 | IREB2                       | a | c | 0.6682 | -0.1488 | 0.0214 | 3.93E-12 | 4330 |
| rs2568494   | 15:78740932 | IREB2                       | a | g | 0.3318 | 0.1488  | 0.0214 | 3.93E-12 | 4330 |
| rs11637656  | 15:78751961 | IREB2                       | t | c | 0.6047 | 0.1458  | 0.021  | 3.94E-12 | 4330 |
| rs28395178  | 15:78850558 | Intergenic (PSMA4/CHRNA5)   | a | g | 0.2    | -0.2344 | 0.0338 | 4.07E-12 | 3433 |
| rs7181486   | 15:78741618 | IREB2                       | t | c | 0.6692 | -0.1486 | 0.0214 | 4.11E-12 | 4330 |
| rs1700006   | 15:78875623 | CHRNA5                      | a | g | 0.8093 | 0.2403  | 0.0347 | 4.46E-12 | 3433 |
| rs17483721  | 15:78733731 | IREB2                       | t | c | 0.6692 | -0.1484 | 0.0215 | 4.54E-12 | 4330 |
| rs958025    | 15:78759348 | IREB2                       | t | c | 0.2172 | -0.1741 | 0.0252 | 4.57E-12 | 4330 |
| rs4887072   | 15:78925435 | CHRN4                       | a | g | 0.7659 | 0.2138  | 0.0309 | 4.70E-12 | 3433 |
| rs72738718  | 15:78735438 | IREB2                       | c | g | 0.33   | 0.1485  | 0.0215 | 4.86E-12 | 4330 |
| rs17483686  | 15:78733390 | IREB2                       | a | t | 0.6694 | -0.1481 | 0.0215 | 5.06E-12 | 4330 |
| rs190065944 | 15:78859610 | CHRNA5                      | a | g | 0.2745 | 0.2316  | 0.0336 | 5.12E-12 | 3433 |
| rs11634351  | 15:78944718 | Intergenic (RPL18P11/CHRN4) | a | g | 0.3973 | 0.1759  | 0.0255 | 5.22E-12 | 3433 |

|             |             |                                |   |   |        |         |        |          |      |
|-------------|-------------|--------------------------------|---|---|--------|---------|--------|----------|------|
| rs924840    | 15:78731808 | IREB2                          | a | t | 0.7747 | 0.1681  | 0.0244 | 5.39E-12 | 4330 |
| rs11633178  | 15:78944538 | Intergenic (CHRN4)             | a | g | 0.6018 | -0.1759 | 0.0255 | 5.46E-12 | 3433 |
| rs2568483   | 15:78752343 | IREB2                          | a | g | 0.7762 | 0.1679  | 0.0244 | 6.43E-12 | 4330 |
| rs11634543  | 15:79005504 | Intergenic (LOC646934/ADAMTS7) | t | c | 0.4001 | 0.1831  | 0.0267 | 6.58E-12 | 3433 |
| rs2958719   | 15:78743029 | IREB2                          | a | g | 0.7762 | 0.1677  | 0.0244 | 6.62E-12 | 4330 |
| rs2915695   | 15:78739471 | IREB2                          | t | c | 0.2237 | -0.1676 | 0.0244 | 6.77E-12 | 4330 |
| rs2656072   | 15:78744292 | IREB2                          | a | g | 0.221  | -0.1702 | 0.0248 | 7.08E-12 | 4330 |
| rs2656069   | 15:78745707 | IREB2                          | t | c | 0.7762 | 0.1674  | 0.0244 | 7.20E-12 | 4330 |
| rs2568493   | 15:78740233 | IREB2                          | a | g | 0.7762 | 0.1673  | 0.0244 | 7.38E-12 | 4330 |
| rs67426328  | 15:78934318 | CHRN4                          | c | g | 0.6041 | -0.1781 | 0.026  | 7.42E-12 | 3433 |
| rs2656074   | 15:78741384 | IREB2                          | t | c | 0.2237 | -0.1673 | 0.0244 | 7.46E-12 | 4330 |
| rs72738704  | 15:78719832 | Intergenic (IREB2)             | c | g | 0.3275 | 0.1514  | 0.0221 | 7.55E-12 | 4330 |
| rs2656073   | 15:78742276 | IREB2                          | t | g | 0.2237 | -0.1672 | 0.0244 | 7.57E-12 | 4330 |
| rs2568485   | 15:78752114 | IREB2                          | t | c | 0.7797 | 0.171   | 0.025  | 7.60E-12 | 4330 |
| rs2568488   | 15:78736593 | IREB2                          | a | t | 0.7764 | 0.1673  | 0.0244 | 7.63E-12 | 4330 |
| rs2568490   | 15:78738370 | IREB2                          | t | c | 0.2237 | -0.1672 | 0.0244 | 7.63E-12 | 4330 |
| rs1964678   | 15:78754000 | IREB2                          | a | g | 0.3883 | -0.1447 | 0.0212 | 8.16E-12 | 4330 |
| rs28480606  | 15:78762313 | IREB2                          | a | g | 0.7795 | 0.1697  | 0.0249 | 8.75E-12 | 4330 |
| rs4299116   | 15:78766194 | IREB2                          | a | t | 0.6075 | 0.143   | 0.021  | 8.80E-12 | 4330 |
| rs2938674   | 15:78757913 | IREB2                          | a | c | 0.221  | -0.1699 | 0.0249 | 8.80E-12 | 4330 |
| rs951985    | 15:78720923 | Intergenic (IREB2)             | t | g | 0.692  | -0.1607 | 0.0236 | 9.12E-12 | 4330 |
| rs12904234  | 15:78779384 | IREB2                          | t | c | 0.6125 | 0.1433  | 0.021  | 9.31E-12 | 4330 |
| rs4362358   | 15:78796104 | Intergenic (IREB2/AGPHD1)      | t | c | 0.6109 | 0.1454  | 0.0213 | 9.33E-12 | 4330 |
| rs7174190   | 15:78763617 | IREB2                          | t | c | 0.2184 | -0.1705 | 0.025  | 9.38E-12 | 4330 |
| rs12903295  | 15:78778972 | IREB2                          | a | g | 0.3897 | -0.1428 | 0.021  | 9.46E-12 | 4330 |
| rs77438389  | 15:78726271 | Intergenic (IREB2)             | c | g | 0.766  | 0.1687  | 0.0248 | 1.03E-11 | 4330 |
| rs12899135  | 15:78954379 | Intergenic (RPL18P11/CHRN4)    | a | g | 0.6076 | -0.1718 | 0.0253 | 1.05E-11 | 3433 |
| rs55988292  | 15:78936168 | Intergenic (CHRN4)             | a | g | 0.5987 | -0.1763 | 0.0259 | 1.06E-11 | 3433 |
| rs12899351  | 15:78792398 | IREB2                          | t | c | 0.3919 | -0.1418 | 0.0209 | 1.14E-11 | 4330 |
| rs8042260   | 15:78774374 | IREB2                          | a | g | 0.3913 | -0.142  | 0.0209 | 1.17E-11 | 4330 |
| rs11072766  | 15:78771546 | IREB2                          | t | c | 0.2241 | -0.1658 | 0.0244 | 1.18E-11 | 4330 |
| rs8042238   | 15:78774271 | IREB2                          | t | c | 0.6087 | 0.1419  | 0.0209 | 1.18E-11 | 4330 |
| rs13180     | 15:78789488 | IREB2                          | t | c | 0.608  | 0.1417  | 0.0209 | 1.18E-11 | 4330 |
| rs113352275 | 15:78840567 | PSMA4                          | t | c | 0.2005 | -0.2268 | 0.0334 | 1.18E-11 | 3433 |
| rs12916801  | 15:78769130 | IREB2                          | a | g | 0.3891 | -0.1425 | 0.021  | 1.19E-11 | 4330 |
| rs35031105  | 15:78760918 | IREB2                          | t | c | 0.2242 | -0.1656 | 0.0244 | 1.24E-11 | 4330 |
| rs4887057   | 15:78772806 | IREB2                          | a | g | 0.3869 | -0.1432 | 0.0211 | 1.24E-11 | 4330 |
| rs36146269  | 15:78779510 | IREB2                          | a | t | 0.6089 | 0.1417  | 0.0209 | 1.26E-11 | 4330 |
| rs10851906  | 15:78774676 | IREB2                          | a | g | 0.7759 | 0.1654  | 0.0244 | 1.28E-11 | 4330 |
| rs16969894  | 15:78776456 | IREB2                          | t | c | 0.2245 | -0.1656 | 0.0245 | 1.29E-11 | 4330 |
| rs2036533   | 15:78781687 | IREB2                          | a | g | 0.2241 | -0.165  | 0.0244 | 1.41E-11 | 4330 |
| rs12441998  | 15:78929372 | CHRN4                          | a | g | 0.7754 | 0.2117  | 0.0313 | 1.45E-11 | 3433 |
| rs28602670  | 15:78768167 | IREB2                          | c | g | 0.7814 | 0.1689  | 0.025  | 1.46E-11 | 4330 |
| rs28511883  | 15:78783683 | IREB2                          | t | c | 0.2244 | -0.1646 | 0.0244 | 1.53E-11 | 4330 |
| rs8043227   | 15:78768871 | IREB2                          | c | g | 0.3893 | -0.1415 | 0.021  | 1.54E-11 | 4330 |
| rs1996371   | 15:78956806 | Intergenic (RPL18P11/CHRN4)    | t | c | 0.609  | -0.1695 | 0.0251 | 1.54E-11 | 3433 |
| rs1504549   | 15:78766629 | IREB2                          | t | c | 0.6105 | 0.1413  | 0.021  | 1.56E-11 | 4330 |

|             |             |                                      |   |   |        |         |        |          |      |
|-------------|-------------|--------------------------------------|---|---|--------|---------|--------|----------|------|
| rs12101809  | 15:78779801 | IREB2                                | t | c | 0.2241 | -0.1645 | 0.0244 | 1.61E-11 | 4330 |
| rs7174348   | 15:78792439 | IREB2                                | a | g | 0.2118 | -0.172  | 0.0255 | 1.64E-11 | 4330 |
| rs12910910  | 15:78767850 | IREB2                                | t | c | 0.6108 | 0.1413  | 0.021  | 1.64E-11 | 4330 |
| rs74925218  | 15:78796732 | Intergenic (IREB2/AGPHD1)            | t | c | 0.2329 | -0.1671 | 0.0248 | 1.68E-11 | 4330 |
| rs11638830  | 15:78948319 | Intergenic (RPL18P11/CHRN4)          | c | g | 0.3957 | 0.1703  | 0.0253 | 1.74E-11 | 3433 |
| rs965604    | 15:78789223 | IREB2                                | a | g | 0.6098 | 0.1408  | 0.0209 | 1.80E-11 | 4330 |
| rs1316971   | 15:78930510 | CHRN4                                | a | g | 0.2241 | -0.2111 | 0.0314 | 1.80E-11 | 3433 |
| rs11072768  | 15:78929478 | CHRN4                                | a | c | 0.224  | -0.2107 | 0.0314 | 1.81E-11 | 3433 |
| rs11636605  | 15:78928878 | CHRN4                                | a | g | 0.2243 | -0.2105 | 0.0314 | 1.93E-11 | 3433 |
| rs11638490  | 15:79007950 | Intergenic (LOC646934/ADAMTS7)       | t | c | 0.3938 | 0.1791  | 0.0267 | 2.04E-11 | 3433 |
| rs12593229  | 15:78765290 | IREB2                                | t | g | 0.3857 | -0.1417 | 0.0212 | 2.18E-11 | 4330 |
| rs2170311   | 15:78947611 | Intergenic (RPL18P11/CHRN4)          | a | g | 0.3952 | 0.1703  | 0.0255 | 2.25E-11 | 3433 |
| rs34684276  | 15:78813155 | AGPHD1                               | a | g | 0.2725 | 0.1974  | 0.0295 | 2.32E-11 | 3433 |
| rs5019044   | 15:78796282 | Intergenic (IREB2/AGPHD1)            | a | t | 0.2065 | -0.1768 | 0.0265 | 2.44E-11 | 4330 |
| rs72743199  | 15:78975855 | Intergenic (RPL18P11/CHRN4)          | a | t | 0.6182 | -0.1706 | 0.0256 | 2.51E-11 | 3433 |
| rs28681284  | 15:78908565 | CHRNA3                               | t | c | 0.1858 | -0.2362 | 0.0355 | 2.92E-11 | 3433 |
| rs2036529   | 15:78726272 | Intergenic (IREB2)                   | a | t | 0.2306 | -0.1644 | 0.0248 | 3.12E-11 | 4330 |
| rs12901913  | 15:78981348 | Intergenic (LOC646934/ADAMTS7/CHRN4) | t | c | 0.3737 | 0.1725  | 0.0261 | 3.62E-11 | 3433 |
| rs4887077   | 15:78978364 | Intergenic (LOC646934/ADAMTS7/CHRN4) | a | g | 0.3803 | 0.1684  | 0.0254 | 3.68E-11 | 3433 |
| rs113134286 | 15:79012888 | Intergenic (LOC646934/ADAMTS7)       | t | c | 0.3862 | 0.176   | 0.0266 | 3.92E-11 | 3433 |
| rs12910627  | 15:78994933 | Intergenic (LOC646934/ADAMTS7)       | c | g | 0.3845 | 0.1783  | 0.0271 | 4.34E-11 | 3433 |
| rs12903285  | 15:78778953 | IREB2                                | a | g | 0.4207 | -0.1425 | 0.0216 | 4.59E-11 | 4330 |
| rs11072791  | 15:78997076 | Intergenic (LOC646934/ADAMTS7)       | a | c | 0.3742 | 0.1773  | 0.0272 | 6.96E-11 | 3433 |
| rs922692    | 15:78984214 | Intergenic (LOC646934/ADAMTS7/CHRN4) | a | c | 0.3728 | 0.1704  | 0.0261 | 7.16E-11 | 3433 |
| rs1062980   | 15:78792527 | IREB2                                | t | c | 0.6092 | 0.14    | 0.0215 | 7.40E-11 | 4072 |
| rs4887083   | 15:79025577 | LOC646934                            | t | c | 0.3798 | 0.1902  | 0.0293 | 8.30E-11 | 3433 |
| rs4420500   | 15:78962964 | Intergenic (RPL18P11/CHRN4)          | t | c | 0.3851 | 0.1685  | 0.0259 | 8.31E-11 | 3433 |
| rs2656056   | 15:78722519 | IREB2                                | t | c | 0.2438 | -0.1624 | 0.025  | 8.64E-11 | 4330 |
| rs72736802  | 15:78719501 | Intergenic (IREB2)                   | a | t | 0.6554 | -0.1521 | 0.0235 | 8.82E-11 | 4330 |
| rs11072790  | 15:78992025 | Intergenic (LOC646934/ADAMTS7/CHRN4) | t | c | 0.3868 | 0.1742  | 0.0269 | 9.23E-11 | 3433 |
| rs8038543   | 15:79017685 | Intergenic (LOC646934/ADAMTS7)       | a | t | 0.616  | -0.1742 | 0.0269 | 9.34E-11 | 3433 |
| rs2869561   | 15:79025516 | LOC646934                            | t | c | 0.6212 | -0.1897 | 0.0293 | 9.98E-11 | 3433 |
| rs12440014  | 15:78926726 | CHRN4                                | c | g | 0.7622 | 0.1987  | 0.0307 | 1.03E-10 | 3433 |
| rs12594711  | 15:78793921 | IREB2                                | t | c | 0.6036 | 0.1367  | 0.0211 | 1.04E-10 | 4330 |
| rs4887059   | 15:78782095 | IREB2                                | t | c | 0.6112 | 0.1363  | 0.0211 | 1.04E-10 | 4330 |
| rs11639372  | 15:78966655 | Intergenic (RPL18P11/CHRN4)          | t | c | 0.386  | 0.1605  | 0.025  | 1.27E-10 | 3433 |
| rs12902602  | 15:78967401 | Intergenic (RPL18P11/CHRN4)          | a | g | 0.6151 | -0.1603 | 0.0249 | 1.31E-10 | 3433 |
| rs1021071   | 15:78968179 | Intergenic (RPL18P11/CHRN4)          | c | g | 0.3851 | 0.1602  | 0.0249 | 1.31E-10 | 3433 |
| rs76919723  | 15:79017281 | Intergenic (LOC646934/ADAMTS7)       | t | c | 0.6211 | -0.1738 | 0.0271 | 1.35E-10 | 3433 |
| rs4886579   | 15:78969256 | Intergenic (RPL18P11/CHRN4)          | t | c | 0.3851 | 0.1598  | 0.0249 | 1.48E-10 | 3433 |
| rs11072785  | 15:78968229 | Intergenic (RPL18P11/CHRN4)          | t | c | 0.385  | 0.1597  | 0.0249 | 1.54E-10 | 3433 |
| rs28669908  | 15:78910267 | CHRNA3                               | a | c | 0.1779 | -0.2313 | 0.0361 | 1.54E-10 | 3433 |
| rs11629637  | 15:79019024 | Intergenic (LOC646934/ADAMTS7)       | t | c | 0.3837 | 0.1708  | 0.0268 | 1.86E-10 | 3433 |
| rs11639375  | 15:79024214 | LOC646934                            | a | g | 0.3774 | 0.1777  | 0.0279 | 1.89E-10 | 3433 |
| rs11639382  | 15:79024268 | LOC646934                            | a | g | 0.3774 | 0.1778  | 0.0279 | 1.89E-10 | 3433 |
| rs11639347  | 15:79024350 | LOC646934                            | t | c | 0.3774 | 0.1778  | 0.0279 | 1.90E-10 | 3433 |
| rs1825082   | 15:79023433 | LOC646934                            | a | g | 0.3781 | 0.1767  | 0.0277 | 1.90E-10 | 3433 |

|             |             |                                      |   |   |        |         |        |          |      |
|-------------|-------------|--------------------------------------|---|---|--------|---------|--------|----------|------|
| rs11639181  | 15:79024016 | LOC646934                            | a | g | 0.6226 | -0.1777 | 0.0279 | 1.90E-10 | 3433 |
| rs11639049  | 15:79023730 | LOC646934                            | a | g | 0.6222 | -0.1769 | 0.0278 | 1.94E-10 | 3433 |
| rs1825083   | 15:79023467 | LOC646934                            | t | c | 0.6221 | -0.1768 | 0.0278 | 1.97E-10 | 3433 |
| rs11639166  | 15:79023766 | LOC646934                            | c | g | 0.3777 | 0.1768  | 0.0278 | 1.97E-10 | 3433 |
| rs12908207  | 15:79025963 | LOC646934                            | t | g | 0.3716 | 0.1873  | 0.0295 | 2.22E-10 | 3433 |
| rs4886587   | 15:79026822 | LOC646934                            | a | t | 0.3774 | 0.1871  | 0.0295 | 2.33E-10 | 3433 |
| rs3894347   | 15:79026001 | LOC646934                            | a | c | 0.3635 | 0.1907  | 0.0301 | 2.38E-10 | 3433 |
| rs4887086   | 15:79026529 | LOC646934                            | t | c | 0.3782 | 0.1857  | 0.0294 | 2.77E-10 | 3433 |
| rs3829786   | 15:79019546 | Intergenic (LOC646934/ADAMTS7)       | a | c | 0.3818 | 0.1672  | 0.0267 | 3.56E-10 | 3433 |
| rs56117933  | 15:78832349 | PSMA4                                | t | c | 0.8074 | -0.21   | 0.0338 | 4.92E-10 | 3433 |
| rs34225855  | 15:79022136 | LOC646934                            | c | g | 0.6231 | -0.1721 | 0.0277 | 4.99E-10 | 3433 |
| rs67175876  | 15:78928399 | CHRN4                                | a | g | 0.7667 | 0.1963  | 0.0316 | 5.06E-10 | 3433 |
| rs114612145 | 4:69746647  | Intergenic (UGT2B10/UGT2A3)          | a | g | 0.9041 | -0.2221 | 0.0359 | 5.89E-10 | 4290 |
| rs116692755 | 4:69746875  | Intergenic (UGT2B10/UGT2A3)          | c | g | 0.9041 | -0.2221 | 0.0359 | 5.90E-10 | 4290 |
| rs3813567   | 15:78934551 | CHRN4                                | a | g | 0.7751 | 0.1978  | 0.032  | 5.95E-10 | 3433 |
| rs12913260  | 15:79071095 | ADAMTS7                              | a | g | 0.359  | 0.1622  | 0.0262 | 6.16E-10 | 4330 |
| rs116115181 | 4:69717641  | Intergenic (UGT2B10/UGT2A3)          | t | c | 0.0883 | 0.2305  | 0.0373 | 6.29E-10 | 4290 |
| rs11638372  | 15:78983559 | Intergenic (LOC646934/ADAMTS7/CHRN4) | a | g | 0.3647 | 0.1618  | 0.0262 | 6.74E-10 | 3433 |
| rs115319921 | 4:69721662  | Intergenic (UGT2B10/UGT2A3)          | t | c | 0.9116 | -0.2281 | 0.037  | 7.37E-10 | 4290 |
| rs150405933 | 4:69735957  | Intergenic (UGT2B10/UGT2A3)          | t | c | 0.0899 | 0.226   | 0.0367 | 7.40E-10 | 4290 |
| rs2004038   | 15:79071406 | ADAMTS7                              | a | g | 0.3844 | 0.1601  | 0.026  | 7.42E-10 | 4330 |
| rs115542835 | 4:69725113  | Intergenic (UGT2B10/UGT2A3)          | t | g | 0.0884 | 0.2278  | 0.037  | 7.49E-10 | 4290 |
| rs114473265 | 4:69739411  | Intergenic (UGT2B10/UGT2A3)          | t | c | 0.9103 | -0.2254 | 0.0367 | 7.89E-10 | 4290 |
| rs115612883 | 4:69742722  | Intergenic (UGT2B10/UGT2A3)          | a | g | 0.9103 | -0.2255 | 0.0367 | 7.92E-10 | 4290 |
| rs116018225 | 4:69740155  | Intergenic (UGT2B10/UGT2A3)          | t | c | 0.0898 | 0.2253  | 0.0367 | 7.98E-10 | 4290 |
| rs113997869 | 4:69735877  | Intergenic (UGT2B10/UGT2A3)          | t | c | 0.089  | 0.2258  | 0.0368 | 8.06E-10 | 4290 |
| rs35583595  | 15:79020152 | Intergenic (LOC646934/ADAMTS7)       | c | g | 0.6192 | -0.1627 | 0.0265 | 8.36E-10 | 3433 |
| rs112321636 | 15:79072100 | ADAMTS7                              | t | g | 0.3797 | 0.16    | 0.0261 | 8.55E-10 | 4330 |
| rs115293372 | 4:69745127  | Intergenic (UGT2B10/UGT2A3)          | t | c | 0.91   | -0.2245 | 0.0366 | 8.64E-10 | 4290 |
| rs11857532  | 15:78968268 | Intergenic (CHRN4)                   | a | c | 0.5546 | -0.1256 | 0.0205 | 8.65E-10 | 4330 |
| rs115970480 | 4:69752439  | Intergenic (UGT2B10/UGT2A3)          | t | c | 0.0903 | 0.2231  | 0.0365 | 9.46E-10 | 4290 |
| rs116221291 | 4:69750117  | LOC100174950                         | t | c | 0.9097 | -0.223  | 0.0365 | 9.51E-10 | 4290 |
| rs11072763  | 15:78724256 | Intergenic (IREB2)                   | a | g | 0.2424 | -0.177  | 0.0289 | 9.56E-10 | 3433 |
| rs115815311 | 4:69753685  | Intergenic (UGT2B10/UGT2A3)          | a | g | 0.0911 | 0.2219  | 0.0363 | 9.77E-10 | 4290 |
| rs115549616 | 4:69751951  | Intergenic (UGT2B10/UGT2A3)          | c | g | 0.9096 | -0.2227 | 0.0364 | 9.86E-10 | 4290 |
| rs115102804 | 4:69710615  | Intergenic (UGT2B10/UGT2A3)          | t | g | 0.0882 | 0.2283  | 0.0374 | 1.04E-09 | 4290 |
| rs139784893 | 4:69749552  | LOC100174950                         | a | g | 0.0837 | 0.238   | 0.039  | 1.05E-09 | 4290 |
| rs116379644 | 4:69755206  | Intergenic (UGT2B10/UGT2A3)          | a | c | 0.9089 | -0.2212 | 0.0363 | 1.06E-09 | 4290 |
| rs115166258 | 4:69754283  | Intergenic (UGT2B10/UGT2A3)          | a | g | 0.0908 | 0.2214  | 0.0363 | 1.12E-09 | 4290 |
| rs116380956 | 4:69759101  | Intergenic (UGT2B10/UGT2A3)          | a | g | 0.9091 | -0.2211 | 0.0363 | 1.13E-09 | 4290 |
| rs114014249 | 4:69760471  | Intergenic (UGT2B10/UGT2A3)          | a | g | 0.9095 | -0.2209 | 0.0364 | 1.24E-09 | 4290 |
| rs113996790 | 4:69769087  | Intergenic (UGT2B10/UGT2A3)          | t | c | 0.0921 | 0.2208  | 0.0363 | 1.24E-09 | 4290 |
| rs116446865 | 4:69767349  | Intergenic (UGT2B10/UGT2A3)          | t | c | 0.9091 | -0.2208 | 0.0364 | 1.25E-09 | 4290 |
| rs114441621 | 4:69761131  | Intergenic (UGT2B10/UGT2A3)          | t | c | 0.9097 | -0.2213 | 0.0364 | 1.26E-09 | 4290 |
| rs115707640 | 4:69759351  | Intergenic (UGT2B10/UGT2A3)          | t | c | 0.0904 | 0.221   | 0.0364 | 1.27E-09 | 4290 |
| rs114126014 | 4:69768638  | Intergenic (UGT2B10/UGT2A3)          | t | c | 0.9094 | -0.2209 | 0.0364 | 1.31E-09 | 4290 |
| rs116023959 | 4:69766993  | Intergenic (UGT2B10/UGT2A3)          | t | g | 0.0907 | 0.2211  | 0.0364 | 1.31E-09 | 4290 |

|             |             |                                |   |   |        |         |        |          |      |
|-------------|-------------|--------------------------------|---|---|--------|---------|--------|----------|------|
| rs115558925 | 4:69765782  | Intergenic (UGT2B10/UGT2A3)    | a | c | 0.9095 | -0.2209 | 0.0364 | 1.31E-09 | 4290 |
| rs116192600 | 4:69769999  | Intergenic (UGT2B10/UGT2A3)    | c | g | 0.9083 | -0.2205 | 0.0364 | 1.35E-09 | 4290 |
| rs4886591   | 15:79074518 | ADAMTS7                        | a | g | 0.3969 | 0.1542  | 0.0255 | 1.40E-09 | 4330 |
| rs116144535 | 4:69722395  | Intergenic (UGT2B10/UGT2A3)    | a | g | 0.0992 | 0.212   | 0.035  | 1.41E-09 | 4290 |
| rs34563625  | 15:79020278 | Intergenic (LOC646934/ADAMTS7) | c | g | 0.3709 | 0.164   | 0.0271 | 1.51E-09 | 3433 |
| rs3813565   | 15:79019610 | Intergenic (LOC646934/ADAMTS7) | t | g | 0.3768 | 0.1597  | 0.0264 | 1.52E-09 | 3433 |
| rs188560849 | 4:69717968  | Intergenic (UGT2B10/UGT2A3)    | a | c | 0.0835 | 0.2337  | 0.0388 | 1.66E-09 | 4290 |
| rs192169379 | 4:69717969  | Intergenic (UGT2B10/UGT2A3)    | a | t | 0.9165 | -0.2337 | 0.0388 | 1.66E-09 | 4290 |
| rs114373813 | 4:69724935  | Intergenic (UGT2B10/UGT2A3)    | a | g | 0.9166 | -0.2326 | 0.0387 | 1.78E-09 | 4290 |
| rs2869554   | 15:79021037 | Intergenic (LOC646934/ADAMTS7) | t | c | 0.6362 | -0.1695 | 0.0282 | 1.83E-09 | 3433 |
| rs2869861   | 15:79076744 | ADAMTS7                        | a | g | 0.6455 | -0.1485 | 0.0247 | 1.92E-09 | 4330 |
| rs116285470 | 4:69716229  | Intergenic (UGT2B10/UGT2A3)    | a | c | 0.0942 | 0.214   | 0.0357 | 1.97E-09 | 4290 |
| rs115952417 | 4:69717836  | Intergenic (UGT2B10/UGT2A3)    | a | t | 0.9061 | -0.2138 | 0.0356 | 1.98E-09 | 4290 |
| rs114858759 | 4:69727258  | Intergenic (UGT2B10/UGT2A3)    | c | g | 0.0935 | 0.2132  | 0.0356 | 2.03E-09 | 4290 |
| rs114711302 | 4:69727220  | Intergenic (UGT2B10/UGT2A3)    | t | c | 0.0935 | 0.2132  | 0.0356 | 2.03E-09 | 4290 |
| rs116372253 | 4:69728015  | Intergenic (UGT2B10/UGT2A3)    | a | t | 0.9067 | -0.2136 | 0.0356 | 2.04E-09 | 4290 |
| rs115292836 | 4:69731361  | Intergenic (UGT2B10/UGT2A3)    | a | t | 0.0937 | 0.2125  | 0.0354 | 2.05E-09 | 4290 |
| rs116286898 | 4:69719579  | Intergenic (UGT2B10/UGT2A3)    | a | g | 0.0938 | 0.2134  | 0.0356 | 2.06E-09 | 4290 |
| rs115933485 | 4:69725968  | Intergenic (UGT2B10/UGT2A3)    | t | c | 0.0933 | 0.2136  | 0.0357 | 2.07E-09 | 4290 |
| rs115109494 | 4:69732112  | Intergenic (UGT2B10/UGT2A3)    | a | t | 0.0934 | 0.213   | 0.0355 | 2.09E-09 | 4290 |
| rs116118888 | 4:69731469  | Intergenic (UGT2B10/UGT2A3)    | c | g | 0.0934 | 0.2129  | 0.0355 | 2.11E-09 | 4290 |
| rs114866244 | 4:69723767  | Intergenic (UGT2B10/UGT2A3)    | t | c | 0.9062 | -0.2123 | 0.0355 | 2.12E-09 | 4290 |
| rs116498746 | 4:69722960  | Intergenic (UGT2B10/UGT2A3)    | t | c | 0.0938 | 0.2124  | 0.0355 | 2.12E-09 | 4290 |
| rs116020958 | 4:69721871  | Intergenic (UGT2B10/UGT2A3)    | a | g | 0.0935 | 0.213   | 0.0356 | 2.16E-09 | 4290 |
| rs80229697  | 15:79022616 | LOC646934                      | a | g | 0.3461 | 0.1761  | 0.0295 | 2.22E-09 | 3433 |
| rs116017934 | 4:69727682  | Intergenic (UGT2B10/UGT2A3)    | a | g | 0.0941 | 0.2164  | 0.0362 | 2.32E-09 | 4072 |
| rs115264860 | 4:69725006  | Intergenic (UGT2B10/UGT2A3)    | t | c | 0.0941 | 0.2164  | 0.0362 | 2.33E-09 | 4072 |
| rs8027972   | 15:79022615 | LOC646934                      | t | c | 0.6541 | -0.1759 | 0.0295 | 2.37E-09 | 3433 |
| rs4886582   | 15:79021441 | LOC646934                      | a | g | 0.6486 | -0.1702 | 0.0286 | 2.67E-09 | 3433 |
| rs116011053 | 4:69707693  | Intergenic (UGT2B10/UGT2A3)    | a | c | 0.0824 | 0.2388  | 0.0402 | 2.95E-09 | 4290 |
| rs138914938 | 15:79073454 | ADAMTS7                        | c | g | 0.3854 | 0.1498  | 0.0253 | 3.07E-09 | 4330 |
| rs191592946 | 4:69803723  | UGT2A3                         | a | t | 0.9072 | -0.2409 | 0.0407 | 3.20E-09 | 4290 |
| rs4886584   | 15:79021464 | LOC646934                      | a | g | 0.3512 | 0.1689  | 0.0286 | 3.29E-09 | 3433 |
| rs116532484 | 4:69710257  | Intergenic (UGT2B10/UGT2A3)    | a | g | 0.0942 | 0.2117  | 0.0358 | 3.35E-09 | 4290 |
| rs116293706 | 4:69724936  | Intergenic (UGT2B10/UGT2A3)    | t | c | 0.0938 | 0.2157  | 0.0365 | 3.46E-09 | 4290 |
| rs4886586   | 15:79026674 | LOC646934                      | a | g | 0.3619 | 0.179   | 0.0303 | 3.47E-09 | 3433 |
| rs1825084   | 15:79023577 | LOC646934                      | t | c | 0.3232 | 0.1804  | 0.0308 | 4.63E-09 | 3433 |
| rs1825085   | 15:79023578 | LOC646934                      | a | g | 0.6768 | -0.1804 | 0.0308 | 4.64E-09 | 3433 |
| rs4886583   | 15:79021445 | LOC646934                      | a | g | 0.3502 | 0.1671  | 0.0287 | 5.70E-09 | 3433 |
| rs115838239 | 4:69821461  | Intergenic (UGT2A3)            | a | g | 0.9037 | -0.2331 | 0.0402 | 6.48E-09 | 4197 |
| rs116605561 | 4:69739730  | Intergenic (UGT2B10/UGT2A3)    | a | c | 0.89   | -0.1922 | 0.0332 | 6.86E-09 | 4290 |
| rs116052796 | 4:69741799  | Intergenic (UGT2B10/UGT2A3)    | t | g | 0.11   | 0.192   | 0.0332 | 7.01E-09 | 4290 |
| rs35474770  | 15:79074000 | ADAMTS7                        | a | g | 0.6124 | -0.1462 | 0.0252 | 7.03E-09 | 4330 |
| rs149163214 | 4:69743225  | Intergenic (UGT2B10/UGT2A3)    | a | c | 0.8898 | -0.1917 | 0.0331 | 7.16E-09 | 4290 |
| rs114494748 | 4:69757183  | Intergenic (UGT2B10/UGT2A3)    | t | c | 0.111  | 0.1901  | 0.0329 | 7.59E-09 | 4290 |
| rs114826126 | 4:69766119  | Intergenic (UGT2B10/UGT2A3)    | a | t | 0.8896 | -0.1904 | 0.0331 | 8.88E-09 | 4290 |
| rs115824708 | 4:69759022  | Intergenic (UGT2B10/UGT2A3)    | a | c | 0.1107 | 0.1893  | 0.0329 | 8.90E-09 | 4290 |

|             |             |                                |   |   |        |         |        |          |      |
|-------------|-------------|--------------------------------|---|---|--------|---------|--------|----------|------|
| rs115527001 | 4:69761239  | Intergenic (UGT2B10/UGT2A3)    | a | g | 0.8893 | -0.1892 | 0.033  | 9.44E-09 | 4290 |
| rs114795848 | 4:69761311  | Intergenic (UGT2B10/UGT2A3)    | a | g | 0.8893 | -0.1892 | 0.033  | 9.46E-09 | 4290 |
| rs115202858 | 4:69763587  | Intergenic (UGT2B10/UGT2A3)    | a | g | 0.1107 | 0.1892  | 0.033  | 9.50E-09 | 4290 |
| rs114742135 | 4:69766443  | Intergenic (UGT2B10/UGT2A3)    | a | t | 0.8891 | -0.1892 | 0.033  | 9.54E-09 | 4290 |
| rs114237743 | 4:69770779  | Intergenic (UGT2B10/UGT2A3)    | t | g | 0.1134 | 0.1883  | 0.0328 | 9.54E-09 | 4290 |
| rs115835349 | 4:69766364  | Intergenic (UGT2B10/UGT2A3)    | t | c | 0.1109 | 0.1892  | 0.033  | 9.59E-09 | 4290 |
| rs114986615 | 4:69763910  | Intergenic (UGT2B10/UGT2A3)    | t | c | 0.1108 | 0.1891  | 0.033  | 9.59E-09 | 4290 |
| rs115479464 | 4:69718019  | Intergenic (UGT2B10/UGT2A3)    | t | g | 0.8813 | -0.1888 | 0.033  | 1.09E-08 | 4290 |
| rs115389770 | 4:69772690  | Intergenic (UGT2B10/UGT2A3)    | a | g | 0.887  | -0.1903 | 0.0333 | 1.11E-08 | 4290 |
| rs115485831 | 4:69642265  | Intergenic (UGT2B15/UGT2B10)   | a | t | 0.9021 | -0.2075 | 0.0363 | 1.13E-08 | 4290 |
| rs115411305 | 4:69736764  | Intergenic (UGT2B10/UGT2A3)    | c | g | 0.8855 | -0.1849 | 0.0324 | 1.15E-08 | 4290 |
| rs115069780 | 4:69755998  | Intergenic (UGT2B10/UGT2A3)    | a | g | 0.1117 | 0.1876  | 0.0329 | 1.18E-08 | 4290 |
| rs115826258 | 4:69771114  | Intergenic (UGT2B10/UGT2A3)    | t | c | 0.113  | 0.1876  | 0.0329 | 1.21E-08 | 4290 |
| rs115524872 | 4:69721246  | Intergenic (UGT2B10/UGT2A3)    | a | g | 0.1139 | 0.188   | 0.033  | 1.27E-08 | 4290 |
| rs116262380 | 4:69719134  | Intergenic (UGT2B10/UGT2A3)    | t | c | 0.1157 | 0.1881  | 0.0331 | 1.28E-08 | 4290 |
| rs115646318 | 4:69722947  | Intergenic (UGT2B10/UGT2A3)    | t | c | 0.1136 | 0.1877  | 0.033  | 1.33E-08 | 4290 |
| rs115756472 | 4:69729558  | Intergenic (UGT2B10/UGT2A3)    | a | g | 0.8861 | -0.1873 | 0.033  | 1.39E-08 | 4290 |
| rs116691259 | 4:69730377  | Intergenic (UGT2B10/UGT2A3)    | a | g | 0.1131 | 0.1874  | 0.033  | 1.42E-08 | 4290 |
| rs116515246 | 4:69771309  | Intergenic (UGT2B10/UGT2A3)    | a | c | 0.8867 | -0.187  | 0.033  | 1.50E-08 | 4290 |
| rs115600564 | 4:69771283  | Intergenic (UGT2B10/UGT2A3)    | c | g | 0.8867 | -0.187  | 0.033  | 1.50E-08 | 4290 |
| rs114546260 | 4:69771354  | Intergenic (UGT2B10/UGT2A3)    | t | c | 0.8867 | -0.187  | 0.033  | 1.51E-08 | 4290 |
| rs116603350 | 4:69771836  | Intergenic (UGT2B10/UGT2A3)    | a | g | 0.8827 | -0.1842 | 0.0326 | 1.54E-08 | 4197 |
| rs114182442 | 4:69733034  | Intergenic (UGT2B10/UGT2A3)    | a | g | 0.1088 | 0.1901  | 0.0336 | 1.58E-08 | 4290 |
| rs115831974 | 4:69730266  | Intergenic (UGT2B10/UGT2A3)    | a | g | 0.8909 | -0.19   | 0.0336 | 1.61E-08 | 4290 |
| rs115097835 | 4:69659738  | Intergenic (UGT2B15/UGT2B10)   | t | c | 0.0983 | 0.1989  | 0.0352 | 1.63E-08 | 4197 |
| rs11072792  | 15:78999911 | Intergenic (LOC646934/ADAMTS7) | a | g | 0.6092 | -0.153  | 0.0272 | 1.80E-08 | 3433 |
| rs28544432  | 15:78924538 | CHRN4                          | t | g | 0.8279 | 0.2222  | 0.0395 | 1.80E-08 | 3433 |
| rs114970731 | 4:69647536  | Intergenic (UGT2B15/UGT2B10)   | a | g | 0.9027 | -0.2001 | 0.0356 | 1.92E-08 | 4197 |
| rs10163145  | 15:79075335 | ADAMTS7                        | a | g | 0.3994 | 0.1403  | 0.025  | 2.04E-08 | 4330 |
| rs115988542 | 4:69709072  | Intergenic (UGT2B10/UGT2A3)    | a | c | 0.8851 | -0.182  | 0.0324 | 2.04E-08 | 4290 |
| rs684513    | 15:78858400 | CHRNA5                         | c | g | 0.7582 | 0.1845  | 0.0329 | 2.05E-08 | 3433 |
| rs115651349 | 4:69663632  | Intergenic (UGT2B15/UGT2B10)   | a | g | 0.0965 | 0.2     | 0.0357 | 2.07E-08 | 4290 |
| rs140205714 | 4:69664301  | Intergenic (UGT2B15/UGT2B10)   | t | g | 0.9036 | -0.2003 | 0.0357 | 2.08E-08 | 4290 |
| rs114057562 | 4:69663476  | Intergenic (UGT2B15/UGT2B10)   | a | g | 0.0965 | 0.1999  | 0.0357 | 2.09E-08 | 4290 |
| rs115553258 | 4:69656777  | Intergenic (UGT2B15/UGT2B10)   | a | g | 0.0978 | 0.1964  | 0.0351 | 2.14E-08 | 4290 |
| rs36061084  | 15:79074253 | ADAMTS7                        | a | g | 0.4136 | 0.1441  | 0.0257 | 2.16E-08 | 4330 |
| rs113444800 | 4:69661615  | Intergenic (UGT2B15/UGT2B10)   | a | g | 0.903  | -0.1985 | 0.0355 | 2.16E-08 | 4290 |
| rs116001863 | 4:69658879  | Intergenic (UGT2B15/UGT2B10)   | t | c | 0.902  | -0.196  | 0.035  | 2.18E-08 | 4290 |
| rs113999752 | 4:69659833  | Intergenic (UGT2B15/UGT2B10)   | a | c | 0.098  | 0.1958  | 0.035  | 2.23E-08 | 4290 |
| rs12441088  | 15:78928264 | CHRN4                          | t | g | 0.7233 | 0.1709  | 0.0306 | 2.43E-08 | 3433 |
| rs12442456  | 15:78751962 | IREB2                          | t | g | 0.1597 | -0.2033 | 0.0365 | 2.63E-08 | 3433 |
| rs1394371   | 15:78724469 | Intergenic (IREB2)             | t | c | 0.2831 | 0.1259  | 0.0226 | 2.67E-08 | 4330 |
| rs115762070 | 4:69771377  | Intergenic (UGT2B10/UGT2A3)    | a | t | 0.1103 | 0.1865  | 0.0338 | 3.41E-08 | 4290 |
| rs115501639 | 4:69771424  | Intergenic (UGT2B10/UGT2A3)    | t | c | 0.1103 | 0.1865  | 0.0338 | 3.41E-08 | 4290 |
| rs114727760 | 4:69771448  | Intergenic (UGT2B10/UGT2A3)    | c | g | 0.8897 | -0.1865 | 0.0338 | 3.42E-08 | 4290 |
| rs4526984   | 15:78712119 | Intergenic (IREB2)             | a | t | 0.2904 | -0.1639 | 0.0297 | 3.47E-08 | 3433 |
| rs951984    | 15:78720915 | Intergenic (IREB2)             | a | t | 0.2749 | 0.1324  | 0.0241 | 4.21E-08 | 4330 |



Table S3. Descriptive characteristics of samples contributing to chromosome 4 replication analyses.

| Study                    | <i>n</i> | Sex<br>(% male) | Age (years) |      | Cotinine (ng/ml) <sup>a</sup> |       | Medium | Method            | Genotyping platform | Imputation |                  |
|--------------------------|----------|-----------------|-------------|------|-------------------------------|-------|--------|-------------------|---------------------|------------|------------------|
|                          |          |                 | Mean        | SD   | Mean                          | SD    |        |                   |                     | Software   | Reference        |
| FinnTwin <sup>b</sup>    | 135      | 52.6            | 25.6        | 1.7  | 190.0                         | 136.2 | Serum  | Mass spectrometry | Illumina CoreExome  | IMPUTE 2   | 1000G phase 1 v3 |
| FINRISK2007 <sup>b</sup> | 620      | 55.2            | 49.8        | 13.0 | 152.5                         | 99.9  | Serum  | Mass spectrometry | Metabochip          | N/A        | N/A              |

<sup>a</sup> Cotinine mean and standard deviation values refer to raw values prior to standardisation (i.e., conversion to Z-scores). Further study details available in online methods. SD: standard deviation.

<sup>b</sup>Samples independent of the FinnTwin and FINRISK samples used in the discovery phase.

Table S4. Chromosome 4 signal replication results.

| Replication sample       | SNP                                    | Chr | Gene                                    | Position | LD with rs114612145 | EA | EAF  | <i>n</i> | Beta | SE   | <i>p</i> value | <i>p</i> value in discovery |
|--------------------------|----------------------------------------|-----|-----------------------------------------|----------|---------------------|----|------|----------|------|------|----------------|-----------------------------|
| FinnTwin <sup>a</sup>    | rs114612145 (rs77107237 <sup>b</sup> ) | 4   | Intergenic<br>( <i>UGT2B10/UGT2A3</i> ) | 69746647 | N/A                 | G  | 0.07 | 135      | 0.56 | 0.23 | <b>0.014</b>   | 5.89 x 10 <sup>-10</sup>    |
|                          | rs144647471 (rs61750900 <sup>b</sup> ) | 4   | <i>UGT2B10</i>                          | 69681936 | 0.90                | T  | 0.07 | 135      | 0.52 | 0.22 | <b>0.020</b>   | 1.91 x 10 <sup>-5</sup>     |
| FINRISK2007 <sup>a</sup> | rs114866244 (rs6600854 <sup>b</sup> )  | 4   | Intergenic<br>( <i>UGT2B10/UGT2A3</i> ) | 69723767 | 0.88                | C  | 0.06 | 620      | 0.32 | 0.12 | <b>0.007</b>   | 2.12 x 10 <sup>-9</sup>     |

SNP: single nucleotide polymorphism; Chr: chromosome; LD: linkage disequilibrium; EA: effect allele; EAF: effect allele frequency; Beta: change in standard deviation of cotinine level per copy of the effect allele; SE: standard error. Position refers to base pair position in genome build hg19/GRCh37. LD with our top SNP in this region (rs114612145) calculated using [https://caprica.genetics.kcl.ac.uk/~ilori/ld\\_calculator.php](https://caprica.genetics.kcl.ac.uk/~ilori/ld_calculator.php).

<sup>a</sup> Samples independent of the FinnTwin and FINRISK samples used in the discovery phase.

<sup>b</sup> Corresponding SNP rs IDs from build GRCh38.

Table S5. Summary of top SNPs identified from previous GWAS of self-reported smoking quantity and corresponding  $p$  values from cotinine GWAS.

| Author            | Year | $n$    | Chr | Gene                | Top SNP     | $p$ value              | $p$ value from cotinine GWAS |
|-------------------|------|--------|-----|---------------------|-------------|------------------------|------------------------------|
| Thorgeirsson      | 2008 | 15,771 | 15  | <i>CHRNA3</i>       | rs1051730   | $6.00 \times 10^{-20}$ | $4.15 \times 10^{-17}$       |
| Furberg           | 2010 | 73,853 | 15  | <i>CHRNA3</i>       | rs1051730   | $2.75 \times 10^{-73}$ | $4.15 \times 10^{-17}$       |
|                   |      | 73,853 | 10  | <i>LOC100188947</i> | rs1329650   | $5.67 \times 10^{-10}$ | 0.89                         |
|                   |      | 73,956 | 10  | <i>LOC100188947</i> | rs1028936   | $1.29 \times 10^{-9}$  | 0.32                         |
|                   |      | 73,853 | 19  | <i>EGLN2</i>        | rs3733829   | $1.04 \times 10^{-8}$  | 0.09                         |
| Thorgeirsson      | 2010 | 76,972 | 15  | <i>CHRNA3</i>       | rs1051730   | $2.40 \times 10^{-69}$ | $4.15 \times 10^{-17}$       |
|                   |      | 83,317 | 19  | <i>CYP2A6</i>       | rs4105144   | $2.20 \times 10^{-12}$ | Not included                 |
|                   |      | 84,956 | 8   | <i>CHRNA3</i>       | rs6474412   | $1.40 \times 10^{-8}$  | 0.08                         |
| Liu (Ox-GSK only) | 2010 | 15,574 | 15  | <i>CHRNA3</i>       | rs1051730*  | $9.45 \times 10^{-19}$ | $4.15 \times 10^{-17}$       |
|                   |      | 15,574 | 15  | <i>CHRNA5</i>       | rs55853698# | $1.31 \times 10^{-16}$ | $3.82 \times 10^{-17}$       |
|                   |      | 15,574 | 15  | <i>CHRNA3</i>       | rs6495308   | $3.30 \times 10^{-10}$ | $1.53 \times 10^{-14}$       |
| David‡            | 2012 | 32,389 | 15  | near <i>CHRNA5</i>  | rs2036527   | $1.84 \times 10^{-8}$  | $4.01 \times 10^{-17}$       |

\*SNP with lowest  $p$ -value from HapMap (release 22) based analyses in Ox-GSK.

#SNP with lowest  $p$ -value from 1000 Genomes (Pilot 1) based analyses in Ox-GSK.

‡ African American sample
